# Supplementary material for: Identification of microRNAs Responding to Aluminium, Cadmium and Salt Stresses in Barley Roots
Source: Plants (Basel). 2021 Dec 14;10(12):2754. doi: 10.3390/plants10122754 (PMC8704135; doi:10.3390/plants10122754)
Supplement: Supplementary file 1 [file plants-10-02754-s001.zip]

Archive with 5 entries (5 files):
- Response to reviewer 1.pdf
- Response to reviewer 2.pdf
- Response to reviewer 3.pdf
- Supplemental Table.xlsx
- Supplementary Figures.pdf
