# Supplementary material for: Identification of microRNAs Responding to Aluminium, Cadmium and Salt Stresses in Barley Roots
Source: Plants (Basel). 2021 Dec 14;10(12):2754. doi: 10.3390/plants10122754 (PMC8704135; doi:10.3390/plants10122754)
Supplement: Supplementary file 1 [file plants-10-02754-s001.zip › Supplemental Table.xlsx]

## Sheet: Table S1
Table S1. Detailed information of miRNAs identified in roots of barley.
miRNA family	miRNA name	miRNA sequence	length	genomeID	start	end	rep_miRSeq	type	sequence in miRbase	MFEI	counts-without Al	counts-Al treatment	counts-without Cd	counts-Cd treatment	counts-without salt	counts-salt treatment	transcript	annotation	degradome detectio-
MIR156	ata-miR156a-3p	GCTCACCCTCTCTCTGTCAGC	21	chr3H	59655581	59655691	GCTCACCCTCTCTCTGTCAGC	3'	Yes	1	14078.7	16215.7	8087.04	8354.3	6809.35	12246.8	HORVU3Hr1G072810.1	Gibberellin 2-oxidase	+
																	HORVU1Hr1G078160.1	P-loop containing nucleoside triphosphate hydrolases superfamily	+
	ata-miR156a-5p	TGACAGAAGAGAGTGAGCAC	20	chr6H	116985013	116985146	TGACAGAAGAGAGTGAGCAC	5'	Yes	1	835.73	593.51	837.968	1089.98	704.308	647.857	HORVU3Hr1G094730.2	Squamosa promoter-binding-like protein 2	+
																	HORVU6Hr1G019700.2	Squamosa promoter-binding-like protein 3	+
																	HORVU5Hr1G076380.9	Squamosa promoter-binding-like protein 16	+
	ata-miR156b-3p	GCTCACTTCTCTCTCTGTCAGC	22	chr3H	59655964	59656089	GCTCATTTCTCTCTCTGTCAGC	3'	Diff	1.1	3017.2	6706.18	1262.77	2061.65	1063.49	4103.46	HORVU6Hr1G028980.8	cinnamoyl coa reductase 1	-
	ata-miR156d-3p	GCTCACTCCTCTTTCTGTCAGC	22	chr6H	116985013	116985146	GCTCACTCCTCTTTCTGTCAGC	3'	Yes	1	3576.11	3345.94	2413.4	3077.43	2047.27	4911.61	HORVU5Hr1G042740.2	UDP-Glycosyltransferase superfamily	+
	bdi-miR156f-3p	GCTCACTGCTCTATCTGTCAGC	22	chr3H	59655784	59655882	GCTCACTGCTCTATCTGTCAGC	3'	Yes	1	87.18	179.62	71.4459	119.557	59.747	186.588	-
	ata-miR156c-3p	GCTCACTGCTCTATCTGTCACC	22	chr2H	623451721	623451830	GCTCACTGCTCTATCTGTCACC	3'	Yes	1	97.05	79.17	178.633	117.885	-	-	-
	bdi-miR156h-3p	GCTCACTGCTCTTCCTGTCATC	22				GCTCACTGCTCTTCCTGTCATC	3'	Yes	0.9	667.25	841.35	-	-	-	-	HORVU4Hr1G025850.7	Structure-specific endonuclease subunit slx1	-
																	HORVU4Hr1G012480.3	Leucine-rich receptor-like protein kinase family protein	-
	sbi-miR156e-5p	TGACAGAAGAGAGCGAGCAC	20	chr7H	637931579	637931730	TGACAGAAGAGAGCGAGCAC	5'	Yes	0.9	-	-	-	2.29919	-	11.4315	HORVU3Hr1G094730.2	Squamosa promoter-binding-like protein 2	+
																	HORVU6Hr1G019700.2	Squamosa promoter-binding-like protein 3	+
																	HORVU5Hr1G076380.9	Squamosa promoter-binding-like protein 16	+
	gma-miR156a-5p	TGACAGAAGAGAGTGAGCAT	20	chr3H	59655852	59655948	TGACAGAAGAGAGTGAGCAC	5'	Diff	1	-	-	5.20889	14.5434	14.498	11.2851	HORVU3Hr1G094730.2	Squamosa promoter-binding-like protein 2	+
																	HORVU6Hr1G019700.2	Squamosa promoter-binding-like protein 3	+
	hvu-miR156a-3p_2	GCTCACCCTCTCTCTGTCAGCTT	23	chr3H	59655488	59655651		3'	Diff	1	-	-	31.1744	33.7058	-	-	-
	hvu-miR156f	TGACAGAAGAGAATGAGCAC	20	chr2H	623451722	623451829		5'	Yes	1	-	-	-	2.68239	-	-	HORVU3Hr1G094730.2	Squamosa promoter-binding-like protein 2	+
																	HORVU6Hr1G019700.2	Squamosa promoter-binding-like protein 3	+
	hvu-miR156a_2	ATGACAGAAGAGAGTGAGCAC	21	chr6H	116985040	116985126		5'	Diff	1.1	-	-	11.8689	16.7416	-	-	HORVU3Hr1G094730.2	Squamosa promoter-binding-like protein 2	+
																	HORVU5Hr1G076380.9	Squamosa promoter-binding-like protein 16	+
																	HORVU6Hr1G031450.6	squamosa promoter binding protein-like 2	+
																	HORVU6Hr1G019700.2	Squamosa promoter-binding-like protein 3	+
	zma-miR156a-3p	GCTCACTTCTCTCTCTGTCAGT	22	chr3H	59655871	59656022	GCTCACTTCTCTCTCTGTCAGT	3'	Yes	1.1	-	-	-	-	2.27791	5.64253	-
	ata-miR156c-3p	TGCTCACTGCTCTATCTGTCACC	23	chr2H	623451721	623451830	GCTCACTGCTCTATCTGTCACC	3'	Diff	1	-	-	-	-	150.48	276.147	-
MIR159	hvu-miR159a	TTTGGATTGAAGGGAGCTCTG	21	chr3H	14301438	14301635	TTTGGATTGAAGGGAGCTCTG	3'	Yes	0.9	4647.68	4015.64	7332.06	5985.78	6192.72	5087.32	HORVU3Hr1G079490.4	MYB domain protein 33	+
	hvu-MIR159a-5p	GAGCTCCTATCATTCCAATGA	21	chr3H	14301438	14301635	gagctcctatcattccaatga	5'	New	0.9	1805.56	1335.5	1349.23	1983.51	1133.96	1479.11	HORVU1Hr1G088510.1	Mitogen-activated protein kinase 16	-
	cpa-miR159a	TTTGGATTGAAGGGAGCTCTAT	22				TTTGGATTGAAGGGAGCTCTA	3'	Diff	1	22.25	38.12	-	-	-	-	HORVU1Hr1G068520.6	MYB domain protein 33	+
																	HORVU0Hr1G001230.9	MYB domain protein 33	+
	lus-miR159c	TTTGGATTGAAGGGAGCTCTTT	22				TTTGGATTGAAGGGAGCTCTT	3'	Diff	1	331.72	409.36	-	-	-	-	HORVU3Hr1G079490.4	MYB domain protein 33	+
	osa-miR319a-3p.2-3p	TTGGACTGAAGGGTGCTCCCT	21	chr3H	450077800	450077987	TTGGACTGAAGGGTGCTCCC	3'	Diff	1	370.31	289.71	374.558	1298.49	317.509	675.061	HORVU2Hr1G060120.1	TCP family transcription factor 4 (TCP4)	+
																	HORVU5Hr1G103400.1	TCP family transcription factor 4 (TCP4)	+
	bdi-miR319b-5p	AGAGCTCTCTTCAGTCCACTC	21	chr3H	450077800	450077987	AGAGCTCTCTTCAGTCCACTC	5'	Yes	1	5.95	4.09	8.511	62.997	7.11497	40.1214	HORVU7Hr1G050300.3	RNA-binding protein 34	+
																	HORVU4Hr1G023820.1	Beta-1,3-galactosyltransferase 15	+
																	HORVU5Hr1G022100.2	Succinyl-CoA ligase [ADP-forming] subunit beta	+
	tae-miR319	TGGACTGAAGGGAGCTCCCTC	21				TTGGACTGAAGGGAGCTCCCT	3'	Diff	0.9	828.14	950.08	-	-	-	-	HORVU2Hr1G103310.2	Nucleoredoxin	+
	zma-miR319b-5p	AGAGCGTCCTTCAGTCCACTC	21				AGAGCGTCCTTCAGTCCACTC	5'	Yes	0.9	51.96	43.65	-	-	-	-	HORVU5Hr1G066030.1	Activating signal cointegrator 1	-
MIR160	ata-miR160a-5p	TGCCTGGCTCCCTGTATGCCA	21	chr7H	562988500	562988603	TGCCTGGCTCCCTGTATGCCA	5'	Yes	0.9	4502.89	3315.31	5358.09	3412.19	4507.78	3917.02	HORVU2Hr1G089670.2	Auxin response factor 10 (ARF 10)	+
																	HORVU2Hr1G089660.7	Auxin response factor 10 (ARF 10)	+
																	HORVU7Hr1G101270.6	Auxin response factor 16 (ARF 16)	+
																	HORVU6Hr1G026750.1	Auxin response factor 18 (ARF 18)	+
																	HORVU1Hr1G041770.6	Auxin response factor 22 (ARF 22)	+
	ata-miR160c-3p	GCGTGCAAGGAGCCAAGCATG	21	chr7H	562988500	562988603	GCGTGCAAGGAGCCAAGCATG	3'	Yes	0.9	42.07	38.7	45.6477	76.3609	38.6636	32.2925	HORVU2Hr1G016120.3	GRAS family transcription factor containing protein	-
																	HORVU3Hr1G091240.3	DNA cross-link repair 1 protein	-
	tae-MIR160-3p	GCGTGCGAGGAGCCAAGCATGA	22	chr5H	614132461	614132606	gcgtgcgaggagccaagcatga	3'	New	0.8	-	-	19.2497	9.94498	16.2332	-	HORVU2Hr1G081950.2	Leucine-rich receptor-like protein kinase family protein	-
	osa-miR160f-5p	TGCCTGGCTCCCTGAATGCCA	21	chr7H	166515186	166515367	TGCCTGGCTCCCTGAATGCCA	5'	Yes	0.7	-	-	2.60444	-	2.27791	-	HORVU1Hr1G041770.6	Auxin response factor 22 (ARF 22)	+
																	HORVU2Hr1G089660.7	Auxin response factor 10 (ARF 10)	+
																	HORVU2Hr1G089670.2	Auxin response factor 10 (ARF 10)	+
																	HORVU6Hr1G026750.1	Auxin response factor 18 (ARF 18)	+
	ath-miR160a-5p	CTGCCTGGCTCCCTGTATGCCA	22	chr7H	562988545	562988692	TGCCTGGCTCCCTGTATGCCA	5'	Diff	0.9	-	-	-	-	321.254	344.41	HORVU1Hr1G041770.6	Auxin response factor 22 (ARF 22)	+
																	HORVU2Hr1G089670.2	Auxin response factor 10 (ARF 10)	+
																	HORVU6Hr1G026750.1	Auxin response factor 18 (ARF 18)	+
	pab-miR160a-5p	ATCTGCCTGGCTCCCTGTATGCCA	24	chr7H	421609442	421609565	TGCCTGGCTCCCTGTATGCCA	5'	Diff	0.9	-	-	-	-	19.3285	19.8573	-
	smo-miR160a-5p	TCTGCCTGGCTCCCTGTATGCCA	23	chr6H	104329906	104330075	TGCCTGGCTCCCTGTATGCCA	5'	Diff	0.9	-	-	-	-	24.2527	14.1063	-
	ppt-miR160b-5p	CGCCTGGCTCCCTGTATGCCA	21	chr5H	510451404	510451510	CGCCTGGCTCCCTGTATGCCA	5'	Yes	0.9	-	-	-	-	9.84846	10.0209	-
MIR164	ata-miR164a-5p	TGGAGAAGCAGGGCACGTGCT	21	chr6H	548192622	548192711	TGGAGAAGCAGGGCACGTGCT	5'	Yes	1.1	614.22	467.12	1321.23	529.992	1114.07	509.725	HORVU2Hr1G080460.8	NAC domain protein,	+
																	HORVU7Hr1G072670.3	NAC domain containing protein 1	+
																	HORVU5Hr1G011650.2	NAC domain containing protein 1	+
																	HORVU5Hr1G041400.1	Phytosulfokine 2	+
	ata-miR164b-5p	TGGAGAAGCAGGGCACGTGCA	21				TGGAGAAGCAGGGCACGTGCA	5'	Yes	0.9	1074.43	985.75	-	-	1362.64	1481.66	HORVU2Hr1G080460.8	NAC domain protein,	+
																	HORVU5Hr1G041400.1	Phytosulfokine 2	+
	gma-miR164a-5p	ATGGAGAAGCAGGGCACGTGCT	22	chr6H	509066110	509066218	TGGAGAAGCAGGGCACGTGCA	5'	Diff	1.1	-	-	3.12533	-	2.73349	-	HORVU2Hr1G080460.8	NAC domain protein,	+
	ata-miR164c-3p	CACGTGTTCTTCTCCTCCATC	21	chr2H	49040201	49040376	CACGTGTTCTTCTCCTCCATC	3'	Yes	0.8	446.64	578.69	-	-	-	-	HORVU6Hr1G088160.5	Quinone oxidoreductase	+
	hvu-miR164_1	TGGAGAAGCAGGGCACGTGCG	21	chr1H	428387322	428387464		5'	Diff	0.9	-	-	64.8417	23.6805	-	-	HORVU5Hr1G011650.2	NAC domain containing protein 1	+
																	HORVU7Hr1G072670.3	NAC domain containing protein 1	+
																	HORVU5Hr1G041400.1	Phytosulfokines 2	+
	hvu-miR164g-3p	CACGCGCTCCCCTTCTCCACC	21	chr1H	428387322	428387464		3'	Diff	0.9	-	-	-	3.87338	-	-	HORVU5Hr1G114230.2	Bowman-Birk type trypsin inhibitor	+
	hvu-miR164_2	GGAGAAGCAGGGCACGTGCA	20	chr2H	49041214	49041372		5'	Diff	0.8	-	-	66.0603	102.629	-	-	HORVU2Hr1G080460.8	NAC domain protein,	+
																	HORVU2Hr1G044620.1	undescribed protein	+
																	HORVU5Hr1G041400.1	Phytosulfokines 2	+
	hvu-miR164c-3p_1	TGCACGTGTTCTTCTCCTCCA	21	chr2H	49041214	49041372		3'	Diff	0.8	-	-	12.0131	19.9884	-	-	HORVU5Hr1G000510.1	Protein FANTASTIC FOUR 3	+
	tae-miR164-5p.2	CTGGAGAAGCAGGGCACGTGCA	22	chr1H	311889071	311889220	TGGAGAAGCAGGGCACGTGCA	5'	Diff	0.9	-	-	-	-	22.1623	28.2451	-
	bdi-miR164c-3p	ATGTGCTCTCCTTCTCCAGCA	21	chr6H	548192562	548192670	CATGTGCGCTCCTTCTCCAGC	3'	Diff	1.1	-	-	-	-	55.5398	49.475	HORVU2Hr1G085780.12	LETM1 and EF-hand domain-containing protein 1, mitochondrial	+
MIR166	hvu-miR166a	TCGGACCAGGCTTCATTCCCC	21	chr5H	593550033	593550132	TCGGACCAGGCTTCATTCCCC	3'	Yes	0.9	75691.7	42973.3	90032.5	110872	75701	75994.7	HORVU5Hr1G010650.1	Homeobox-leucine zipper protein family	+
																	HORVU5Hr1G061410.29	Homeobox-leucine zipper protein HOX10	+
																	HORVU0Hr1G010250.3	Homeobox-leucine zipper protein HOX32	+
																	HORVU1Hr1G041790.2	Homeobox-leucine zipper protein family	+
	ata-miR166a-3p	CTCGGACCAGGCTTCATTCCCC	22	chr1H	353507024	353507144	TCGGACCAGGCTTCATTCCCC	3'	Diff	1	556.05	383.53	821.897	857.283	692.479	803.862	HORVU1Hr1G041790.2	Homeobox-leucine zipper protein family	+
																	HORVU5Hr1G010650.1	Homeobox-leucine zipper protein family	+
	ata-miR166a-5p	GGAATGTTGTCTGGTTCAAGG	21	chr1H	353507024	353507144	GGAATGTTGTCTGGTTCAAGG	5'	Yes	1	605.09	369.44	678.237	1411.89	576.973	291.099	HORVU1Hr1G076940.1	Nucleotide-diphospho-sugar transferase family protein	-
																	HORVU6Hr1G005350.2	GPI mannosyltransferase 3	-
	ata-miR166b-5p	GAATGACGCCGGGTCCGAAAG	21	chr5H	593550033	593550132	GGGAATGACGCCGGGTCCGAAA	5'	Diff	0.9	40.74	15.42	9.376	8.57273	8.20046	-	HORVU4Hr1G048510.1	Cyclin-dependent kinase C;1	-
	ata-miR166c-3p	TCGGACCAGGCTTCATTCCTT	21	chr6H	507756471	507756561	TCGGACCAGGCTTCATTCCTT	3'	Yes	0.7	-	-	75.5804	72.0695	63.7469	30.8439	HORVU1Hr1G041790.2	Homeobox-leucine zipper protein family	+
																	HORVU5Hr1G061410.29	Homeobox-leucine zipper protein HOX10	+
	ata-miR166a-3p.2	CTTCGGACCAGGCTTCATTCCC	22	chr4H	495608803	495608927	TCGGACCAGGCTTCATTCCCC	3'	Diff	0.9	-	-	75.2037	103.787	58.3737	31.5112	HORVU1Hr1G041790.2	Homeobox-leucine zipper protein family	+
																	HORVU5Hr1G010650.1	Homeobox-leucine zipper protein family	+
	ata-miR166c-3p	TCGGACCAGGCTTCATTCTTTT	22	chr6H	507756471	507756561	TCGGACCAGGCTTCATTCCTT	3'	Diff	0.7	96.15	71.75	-	-	-	-	HORVU5Hr1G010650.1	Homeobox-leucine zipper protein family	+
																	HORVU0Hr1G010250.3	Homeobox-leucine zipper protein HOX32	+
	ata-miR166d-5p	GGAATGTTGTCTGGCTCGGGG	21	chr7H	558749213	558749420	GGAATGTTGTCTGGCTCGGGG	5'	Yes	0.8	922.9	639.64	-	-	-	-	HORVU4Hr1G018020.2	F-box/WD-40 repeat-containing protein	-
	hvu-MIR166l-5p	TGAATGTTGTCTGGTTCAAGG	21	chr1H	353507009	353507152		5'	New	1	-	-	-	16.4205	-	-	HORVU1Hr1G076940.1	Nucleotide-diphospho-sugar transferase family protein	-
	hvu-miR166p	TCGGACCAGGCTTCATTCT	19	chr1H	353507009	353507152		3'	Diff	1	-	-	11.7247	18.7792	-	-	HORVU1Hr1G041790.2	Homeobox-leucine zipper protein family	+
																	HORVU5Hr1G061410.29	Homeobox-leucine zipper protein HOX10	+
	osa-miR166a-3p	TCGGACCAGGCTTCATTCCCA	21	chr5H	593550031	593550135	TCGGACCAGGCTTCATTCCCC	3'	Diff	0.9	-	-	-	-	291.942	280.405	-
	sbi-miR166a-3p	ATCGGACCAGGCTTCATTCCC	21	chr1H	353507009	353507152	TCGGACCAGGCTTCATTCCC	3'	Diff	1	-	-	-	-	7.30247	-	-
	ata-miR166e-5p	GGAATGTTGTCTGGTTGGAGA	21	chr4H	495608803	495608927	GGAATGTTGTCTGGTTGGAGA	5'	Yes	0.9	-	-	-	-	7.75147	6.34785	-
	osa-miR166e-3p	GCGGACCAGGCTTCATTCCCC	21	chr1H	123757929	123758072	TCGAACCAGGCTTCATTCCCC	3'	Diff	1	-	-	-	-	109.626	264.194	HORVU5Hr1G010650.1	Homeobox-leucine zipper protein family	+
	ath-miR165a-3p	CCGGACCAGGCTTCATTCCCC	21	chr5H	494104822	494104926	TCGGACCAGGCTTCATCCCCC	3'	Diff	0.9	-	-	-	-	32.4729	54.8191	-
	ata-miR5168-3p	TCGGACCAGGCTTCAATCCCT	21	chr5H	513807909	513808030	TCGGACCAGGCTTCAATCCCT	3'	Yes	1.1	3.04	-	4.688	3.44878	4.10023	-	HORVU5Hr1G010650.1	Homeobox-leucine zipper protein family	+
																	HORVU5Hr1G061410.29	Homeobox-leucine zipper protein HOX10	+
																	HORVU0Hr1G010250.3	Homeobox-leucine zipper protein HOX32	+
																	HORVU1Hr1G041790.2	Homeobox-leucine zipper protein family	+
MIR167_1	ata-miR167a-5p	TGAAGCTGCCAGCATGATCTA	21	chr5H	622520521	622520641	TGAAGCTGCCAGCATGATCTA	5'	Yes	1	823.37	532.73	936.346	523.262	789.631	738.069	HORVU2Hr1G121110.32	Auxin response factor 6	+
	ata-miR167a-3p	GATCGTGCTGTGACAGTTTCACT	23				GATCGTGCTGTGACAGTTTCACC	3'	Diff	0.9	357.48	292.35	-	-	371.421	600.357	-
	ata-miR167b-3p	AGGTCATGCTGGAGTTTCATC	21	chrUn	58632832	58632924	AGGTCATGCTGGAGTTTCATC	3'	Yes	1	243.2	128.26	127.037	285.078	108.313	118.552	HORVU1Hr1G075520.2	Jacalin-related lectin 3	-
	ata-miR167b-5p	TGAAGCTGCCAGCATGATCTGA	22	chrUn	58632832	58632924	TGAAGCTGCCAGCATGATCTGA	5'	Yes	1	2288.4	3428.15	3094.49	2593.11	2608.13	2076.74	HORVU2Hr1G059280.1	SWI/SNF complex subunit SWI3C	-
																	HORVU2Hr1G059130.1	SWI/SNF complex subunit SWI3C	-
	ata-miR167c-3p	ATCATGACTGACAGCCTCATT	21	chrUn	58635463	58635558	GATCATGACTGACAGCCTCATT	3'	Diff	1	28.65	12.35	65.4741	7.70536	55.6204	6.49428	HORVU5Hr1G077110.3	UDP-glucose 4-epimerase 4	+
	tae-miR167c-5p	TGAAGCTGCCAGCATGATCTGC	22	chr6H	136921497	136921639	TGAAGCTGCCAGCATGATCTGC	5'	Yes	0.8	5995.1	9364.03	6687.33	15392.7	5662.56	6525.66	HORVU1Hr1G077630.2	Ubiquitin carboxyl-terminal hydrolase 25	-
																	HORVU2Hr1G059280.1	SWI/SNF complex subunit SWI3C	-
																	HORVU2Hr1G059130.1	SWI/SNF complex subunit SWI3C	-
	ata-miR167f-3p	AGATCATGCTGCAGCTTCATT	21	chr6H	136921497	136921639	CAGATCATGCTGCAGCTTCAT	3'	Diff	0.8	138.41	169.17	146.905	473.427	123.936	429.498	HORVU4Hr1G016990.3	Cysteine desulfurase	-
	vvi-miR167c-5p	TGAAGCTGCCAGCATGATCTC	21	chrUn	58632869	58633005	TGAAGCTGCCAGCATGATCTC	5'	Yes	1	-	-	4.48806	-	3.65124	-	HORVU2Hr1G059130.1	SWI/SNF complex subunit SWI3C	-
																	HORVU2Hr1G059280.1	SWI/SNF complex subunit SWI3C	-
	ata-miR167a-3p.2	ATCGTGCTGTGACAGTTTCACT	22	chr5H	495143035	495143192	GATCGTGCTGTGACAGTTTCACC	3'	Diff	0.9	-	-	307.144	142.451	267.275	690.61	-
	osa-miR167d-5p	CTGAAGCTGCCAGCATGATCTGA	23	chr6H	175369707	175369852	TGAAGCTGCCAGCATGATCTG	5'	Diff	0.9	-	-	57.6282	43.9719	42.7638	54.9331	HORVU2Hr1G059130.1	SWI/SNF complex subunit SWI3C	-
																	HORVU2Hr1G059280.1	SWI/SNF complex subunit SWI3C	-
	ath-miR167a-5p	TGAAGCTGCCAGCATGATCTGT	22	chr4H	591009123	591009299	TGAAGCTGCCAGCATGATCTA	5'	Diff	0.9	-	-	66.5811	81.2895	64.4771	58.9045	-
	ata-miR167d-3p	AGGTCATGTGGCAGCTTCATT	21	chr4H	590940930	590941054	AGGTCATGTGGCAGCTTCATT	3'	Yes	1	2.03	5.35	-	-	-	-	HORVU5Hr1G115360.3	RING/FYVE/PHD zinc finger superfamily protein	-
	hvu-miR167e-3p	GGTCATGCTGCGGCAGCCTCACT	23	chr5H	622520521	622520641		3'	Yes	1	-	-	-	8.00829	-	-	-
	hvu-miR167e	TGAAGCTGCCAGCATGATCTTA	22	chr4H	591009123	591009299		5'	Diff	0.9	-	-	2.60444	-	-	-	HORVU5Hr1G009650.20	Auxin response factor 6 (ARF6)	+
	bdi-miR167a-5p	TGAAGCTGCCAGCATGATCTAT	22	chr5H	622520502	622520666	TGAAGCTGCCAGCATGATCTA	5'	Diff	1	-	-	-	-	12.6757	20.0797	-
	osa-miR167d-5p.2	TGAAGCTGCCAGCATGATCTGG	22	chr5H	46219822	46219958	TGAAGCTGCCAGCATGATCTG	5'	Diff	1	-	-	-	-	103.897	52.3343	HORVU1Hr1G077630.2	Ubiquitin carboxyl-terminal hydrolase 25	-
																	HORVU2Hr1G059130.1	SWI/SNF complex subunit SWI3C	-
	gma-miR167e-5p	TGAAGCTGCCAGCATGATCTT	21	chrUn	58635510	58635628	TGAAGCTGCCAGCATGATCTT	5'	Yes	1.1	-	-	-	-	5.92255	16.7756	HORVU5Hr1G009650.20	Auxin response factor 6 (ARF6)	+
MIR168	hvu-miR168-3p	CCCGCCTTGCACCAAGTGAAT	21	chr6H	34582569	34582675	GATCCCGCCTTGCACCAAGTGAAT	3'	Diff	0.8	3875.52	2375.79	3620.18	4140.43	3054.18	1902.53	HORVU5Hr1G037570.4	Receptor-like protein kinase	-
																	HORVU4Hr1G031620.1	14-3-3 protein beta/alpha-A	-
	hvu-miR168-5p	TCGCTTGGTGCAGATCGGGAC	21	chr6H	34582569	34582675	TCGCTTGGTGCAGATCGGGAC	5'	Yes	0.8	4523.51	3081.64	6593.43	5889.19	5550.26	2742.46	HORVU1Hr1G055570.4	WD repeat-containing protein WRAP73	+
																	HORVU2Hr1G105050.1	Protein of unknown function (DUF581)	+
MIR169_1	ata-miR169a-5p	TAGCCAAGGATGATTTGCCTGTG	23	chr5H	659430624	659430741	TAGCCAAGGATGATTTGCCTGTG	5'	Yes	0.8	19.51	21.54	62.0442	8.26981	52.7027	-	HORVU5Hr1G092700.17	Nuclear transcription factor Y subunit A-10 (NF-YA10)	+
																	HORVU4Hr1G075830.4	Nuclear transcription factor Y subunit A-3 (NF-YA3)	+
																	HORVU6Hr1G081080.12	Nuclear transcription factor Y subunit A-5 (NF-YA5)	+
	ata-miR169a-3p	TGGGCAAGTCACCCTGGCTACC	22	chr5H	659430624	659430741	TGGGCAAGTCACCCTGGCTACC	3'	Yes	0.8	104.23	155.94	307.656	41.2092	261.681	3.52658	HORVU4Hr1G087430.2	Uknown	-
	ata-miR169c-5p	TAGCCAAGGATGACTTGCC	19	chr2H	500436326	500436485	TAGCCAAGGATGACTTGCCTA	5'	Diff	0.9	9.55	7.38	100.397	20.7755	83.6979	-	HORVU5Hr1G092700.17	Nuclear transcription factor Y subunit A-10 (NF-YA10)	+
																	HORVU4Hr1G075830.4	Nuclear transcription factor Y subunit A-3 (NF-YA3)	+
																	HORVU6Hr1G081080.12	Nuclear transcription factor Y subunit A-5 (NF-YA5)	+
																	HORVU2Hr1G032130.27	Nuclear transcription factor Y subunit A-5 (NF-YA5)	+
																	HORVU2Hr1G032130.6	Nuclear transcription factor Y subunit A-5 (NF-YA5)	+
	ata-miR169c-3p	AGGCGGTCACCTTGGCTAGC	20	chr2H	500436326	500436485	GGCGGTCACCTTGGCTAGC	3'	Diff	0.9	25.21	14.16	52.3961	9.92428	43.9628	6.34785	HORVU3Hr1G108540.2	Two-component response regulator ARR8	+
	ata-miR169i-5p	TAGCCAAGGATGACTTGCCTG	21	chr5H	553079078	553079204	TAGCCAAGGATGACTTGCCTG	5'	Yes	0.9	100.83	135.25	258.124	62.6319	216.294	29.209	HORVU5Hr1G092700.17	Nuclear transcription factor Y subunit A-10 (NF-YA10)	+
																	HORVU4Hr1G075830.4	Nuclear transcription factor Y subunit A-3 (NF-YA3)	+
																	HORVU6Hr1G081080.12	Nuclear transcription factor Y subunit A-5 (NF-YA5)	+
																	HORVU2Hr1G032130.27	Nuclear transcription factor Y subunit A-5 (NF-YA5)	+
																	HORVU2Hr1G032130.6	Nuclear transcription factor Y subunit A-5 (NF-YA5)	+
	ata-miR169i-3p	AGGCAGTCTCCTTGGCTAGC	20	chr5H	553079078	553079204	GGCAGTCTCCTTGGCTAGC	3'	Diff	0.9	3.88	1.89	13.0548	2.42086	11.0343	-	HORVU2Hr1G013680.1	Elongation factor 1-alpha	+
																	HORVU0Hr1G017020.1	Elongation factor 1-alpha	+
	osa-miR169n-5p.2	TAGCCAAGAATGACTTGCCT	20	chr4H	143526929	143527079	TAGCCAAGAATGACTTGCCTA	5'	Diff	1	-	-	13.52	3.44878	11.2218	-	HORVU5Hr1G035620.1	Serine-threonine kinase receptor-associated protein	-
	bdi-MIR169d-3p.2	GGTGGGTCTTCTTGGCTAAC	20	chr4H	143526929	143527079	ggtgggtcttcttggctagc	3'	New	1	-	-	134.139	36.2872	113.264	-	HORVU4Hr1G081490.1	2-oxoglutarate (2OG) and Fe(II)-dependent oxygenase superfamily protein	+
																	HORVU4Hr1G081500.1	2-oxoglutarate (2OG) and Fe(II)-dependent oxygenase superfamily protein	+
																	HORVU4Hr1G081480.3	2-oxoglutarate (2OG) and Fe(II)-dependent oxygenase superfamily protein	+
	osa-MIR169l-3p	TGGGCAGTCTCCTTGGCTACC	21	chr2H	612911858	612912015	tgggcagtctccttggctagc	3'	New	0.9	-	-	3.64622	-	3.18907	-	HORVU4Hr1G050790.1	Acid phosphatase 1	+
	osa-MIR169f-3p	GCATGTCCTCCTTGGCTATTC	21	chr4H	37700365	37700507	gcatgtcttccttggctattc	3'	New	1	-	-	-	22.5102	-	6.49428	HORVU7Hr1G031850.4	60S ribosomal protein L35a-3	+
	osa-miR169n-5p	TAGCCAAGAATGACTTGCCTA	21	chr4H	67519919	67520080	TAGCCAAGAATGACTTGCCTA	5'	Yes	1	-	-	-	-	63.8406	-	HORVU6Hr1G002150.4	Disease resistance protein	-
MIR169_2	ata-miR169d-5p	CAGCCAAGGATGACTTGCCGG	21	chr2H	691525419	691525520	CAGCCAAGGATGACTTGCCGG	5'	Yes	0.9	74.5	54.17	78.5826	52.4449	65.6325	-	HORVU5Hr1G092700.17	Nuclear transcription factor Y subunit A-10 (NF-YA10)	+
																	HORVU4Hr1G075830.4	Nuclear transcription factor Y subunit A-3 (NF-YA3)	+
																	HORVU6Hr1G081080.12	Nuclear transcription factor Y subunit A-5 (NF-YA5)	+
																	HORVU2Hr1G032130.27	Nuclear transcription factor Y subunit A-5 (NF-YA5)	+
																	HORVU2Hr1G032130.6	Nuclear transcription factor Y subunit A-5 (NF-YA5)	+
	ata-MIR169d-3p	TCCTTGGCTACACCTAGTTCT	21	chr2H	691525419	691525520	TCCTTGGCTACAcctagttct	3'	New	0.9	29.49	15.73	16.036	23.6805	13.5869	-	HORVU5Hr1G089950.4	Chromodomain-helicase-DNA-binding protein Mi-2 homolog	-
	ata-miR169h-3p	GCAAGTTGTTCTTGGCTAGC	20	chr7H	628484019	628484153	GCAAGTTGTTCTTGGCTAGC	3'	Yes	1.1	288.32	164.51	825.269	417.972	-	-	HORVU1Hr1G075540.3	Mitochondrial processing peptidase alpha subunit	+
																	HORVU5Hr1G089950.4	Chromodomain-helicase-DNA-binding protein Mi-2 homolog	+
	ata-miR169e-5p	TGCAGCCAAGGATGACTTGCC	21	chr2H	691521675	691521767	CAGCCAAGGATGACTTGCCGA	5'	Diff	0.9	-	-	25.7772	25.4554	21.7503	-	HORVU2Hr1G032130.27	Nuclear transcription factor Y subunit A-5 (NF-YA5)	+
	ata-miR169f-3p	GGCAAGTCCGTCCTTGGCTAC	21	chr2H	691521675	691521767	GGCAAGTCCGTCCTTGGCTACA	3'	Diff	0.9	-	-	69.0972	77.1728	58.1862	4.2319	HORVU2Hr1G013460.2	Strictosidine synthase-like 2	-
																	HORVU6Hr1G053490.2	BTB/POZ domain-containing protein	-
	zma-miR169c-3p	GGCAAGCTGTCCTTGGCTACA	21	chr2H	566462043	566462231	GGCAAGTCTGTCCTTGGCTACA	3'	Diff	0.9	-	-	70.3158	51.6772	55.2652	-	HORVU2Hr1G013460.2	strictosidine synthase-like 2	-
																	HORVU3Hr1G068000.2	receptor-like protein kinase 2 (RLK)	-
																	HORVU3Hr1G068010.1	Leucine-rich repeat receptor-like protein kinase family protein (LRR-RLK)	-
																	HORVU3Hr1G079010.5	transcription factor-related	-
	ata-miR169e-5p	CAGCCAAGGATGACTTGCCGA	21	chr2H	691521675	691521767	CAGCCAAGGATGACTTGCCGA	5'	Yes	0.9	35.01	38.55	-	-	-	-	HORVU6Hr1G081080.12	Nuclear transcription factor Y subunit A-5 (NF-YA5)	+
																	HORVU4Hr1G075830.4	Nuclear transcription factor Y subunit A-3 (NF-YA3)	+
	ata-miR169f-3p	GGCAAGTCCGTCCTTGGCTACAT	23	chr2H	691521675	691521767	GGCAAGTCCGTCCTTGGCTACA	3'	Diff	0.9	45.03	41.3	-	-	-	-	-
	ata-miR169h-5p	TAGCCAAGGATGACTTGCCG	20	chr7H	628484019	628484153	TAGCCAAGGATGACTTGCCGG	5'	Diff	1.1	50.67	35.19	-	-	-	-	HORVU5Hr1G092700.17	Nuclear transcription factor Y subunit A-10 (NF-YA10)	+
																	HORVU4Hr1G075830.4	Nuclear transcription factor Y subunit A-3 (NF-YA3)	+
																	HORVU6Hr1G081080.12	Nuclear transcription factor Y subunit A-5 (NF-YA5)	+
	bdi-miR169c-3p	GGCAAGCTGTCCTTGGCTAC	20	chr2H	691525333	691525486	GGCAGGTTGTCCTTGGCTAC	3'	Diff	0.9	-	-	-	-	64.8653	3.52658	-
	ata-miR169h-3p	CAAGTTGTTCTTGGCTAGC	19	chr7H	628484019	628484153	GCAAGTTGTTCTTGGCTAGC	3'	Diff	1.1	-	-	-	-	696.908	19.8193	HORVU1Hr1G075540.3	Mitochondrial processing peptidase alpha subunit	+
MIR171_1	ath-miR170-3p	TGATTGAGCCGTGTCAATATC	21	chr7H	562880562	562880645	TGATTGAGCCGTGTCAATATC	3'	Yes	1.2	-	-	-	-	5.01139	-	-
	hvu-miR171-3p	TGATTGAGCCGTGCCAATATC	21	chr4H	617878913	617879061	TGATTGAGCCGTGCCAATATC	3'	Yes	0.8	14768	17954.9	11570	19021.7	9755.89	3933.4	HORVU6Hr1G063650.1	GRAS family transcription factor (GRAS)	+
																	HORVU1Hr1G053510.1	GRAS family transcription factor (GRAS)	+
	ata-miR171b-5p	TGTTGGCATGGTTCAATCAAA	21	chrUn	234895994	234896091	TGTTGGCATGGCTCAATCAAA	5'	Diff	1.1	683.06	421.29	-	-	90.8203	55.1555	HORVU5Hr1G081160.4	U-box domain-containing protein 73	-
	bdi-MIR171e-5p	CGATATTGGTGAGGTTCAATC	21	chr7H	562880616	562880702	cgatattggtgaggttcaatc	5'	New	1.2	29.6	21.15	19.6265	23.3801	16.5078	25.8687	HORVU6Hr1G070680.2	PRELI domain containing protein 3B	-
	bdi-MIR171e-3p	TTGAGCCGTGCCAATATCTCT	21	chr7H	562880616	562880702	TTGAGCCGTGCCAATATCtct	3'	New	1.2	395.5	365.69	-	-	-	-	HORVU1Hr1G053510.1	GRAS family transcription factor (GRAS)	+
																	HORVU6Hr1G063650.1	GRAS family transcription factor (GRAS)	+
	bdi-miR171b-3p	CGATTGAGCCGTGCCAATATC	21	chr2H	699045318	699045409	TGATTGAGCCGTGCCAATATC	3'	Diff	0.9	-	-	5.20889	27.616	4.55581	-	HORVU6Hr1G063650.1	GRAS family transcription factor, SCL6	+
																	HORVU1Hr1G053510.1	GRAS family transcription factor (GRAS)	+
	bdi-MIR171a-5p	TGATTGAGCCGCGCCAATATC	21	chr6H	430343861	430343980	TGATTGAGCCGCGCCAATATC	5'	New	0.6	-	-	416.425	455.853	351.824	273.268	HORVU6Hr1G063650.1	GRAS family transcription factor, SCL6	+
	mes-miR171g-3p	TGATTGAGCCGTGCCAATATCC	22	chr4H	617878854	617878971	TGATTGAGCCGTGCCAATATC	3'	Diff	0.9	-	-	4.48806	2.42086	3.65124	-	HORVU1Hr1G053510.1	GRAS family transcription factor (GRAS)	+
																	HORVU6Hr1G063650.1	GRAS family transcription factor (GRAS)	+
	ata-miR171b-3p	GATCTGATTGAGCCGTGCCAATATC	25	chr1H	389189847	389189987	TGATTGAGCCGTGCCAATATC	3'	Diff	1	-	-	4.16711	8.08856	3.64465	8.87067	-
	hvu-miR171b-5p	GTTGGCATGGTTCAATCAAA	20	chrUn	234895979	234896111		5'	Diff	1	-	-	-	6.75772	-	-	HORVU3Hr1G103160.1	unknown function	-
	hvu-miR171b-3p_1	TGATTGAGTCGTGCCAATATC	21	chrUn	234895979	234896111		3'	Diff	1	-	-	23.1285	33.9077	-	-	HORVU1Hr1G053510.1	GRAS family transcription factor (GRAS)	+
																	HORVU6Hr1G063650.1	GRAS family transcription factor (GRAS)	+
	ata-miR171b-3p.2	CGGTCTGATTGAGCCGTGCCA	21	chr4H	31687507	31687639	cgatcTGATTGAGCCGTGCCA	3'	New	1	-	-	-	-	5.92255	-	-
	cme-MIR171i-3p	TGATTGAGCCGTTCCAATATC	21	chr7H	331603802	331603885	tgaTTGAGCCGTTCCAATATC	3'	New	1.2	-	-	-	-	11.128	-	-
MIR171_2	ata-miR171a-3p	TGAGCCGAACCAATATCACTC	21	chr2H	670129671	670129761	TGAGCCGAACCAATATCACTC	3'	Yes	0.9	1944.73	1519.43	2828.42	3010.2	2389.81	908.395	HORVU4Hr1G061310.1	GRAS family transcription factor (GRAS)	+
	ata-miR171a-5p	TGGTATTGTCTCGGCTCATG	20	chr2H	670129671	670129761	TGGTATTGTTTCGGCTCATG	5'	Diff	0.9	101.45	37.99	116.108	178.676	97.7675	46.2089	HORVU2Hr1G076620.7	T-complex protein 11	+
	lus-miR171h	TGAGCCGAACCAATATCACTCT	22				ATGAGCCGAACCAATATCACT	3'	Diff	0.9	36.47	55.28	37.3693	27.7352	-	-	HORVU4Hr1G061310.1	GRAS family transcription factor (GRAS)	+
MIR172	ata-miR172b-3p	AGAATCTTGATGATGCTGCAT	21	chr6H	531319310	531319412	AGAATCTTGATGATGCTGCAT	3'	Yes	0.9	175.51	113.46	241.191	225.713	202.837	179.98	HORVU5Hr1G112440.1	Ethylene-responsive transcription factor 10	+
																	HORVU1Hr1G011800.24	AP2-like ethylene-responsive transcription factor	+
	ata-miR172b-5p	GCAGCACCACCAAGATTCACA	21	chr6H	531319310	531319412	GCAGCACCACCAAGATTCACA	5'	Yes	0.9	924.66	812.87	728.644	266.241	609.328	598.762	HORVU7Hr1G106280.1	Auxin response factor 6 (ARF6)	+
																	HORVU6Hr1G088570.2	Clathrin interactor EPSIN 2	+
	ata-miR172c-3p	GAATCTTGATGATGCTGCAT	20	chr3H	692685734	692685928	GGAATCTTGATGATGCTGCAT	3'	Diff	1	-	-	5.20889	18.8413	4.55581	-	HORVU1Hr1G055370.1	Phospho-2-dehydro-3-deoxyheptonate aldolase 2, chloroplastic	+
	ata-miR172c-3p	GGAATCTTGATGATGCTGCAT	21	chr3H	692685734	692685928	GGAATCTTGATGATGCTGCAT	3'	Yes	1	14.75	5.22	-	-	-	-	HORVU2Hr1G113880.23	AP2-like ethylene-responsive transcription factor	+
																	HORVU1Hr1G011800.24	AP2-like ethylene-responsive transcription factor	+
MIR390	ata-miR390-5p	AAGCTCAGGAGGGATAGCGCC	21	chr5H	638556917	638557050	AAGCTCAGGAGGGATAGCGCC	5'	Yes	1	480.48	131.95	492.768	526.939	415.142	486.151	HORVU7Hr1G007520.1	Leucine-rich repeat receptor-like protein kinase family protein	-
																	HORVU1Hr1G043790.1	Leucine-rich repeat receptor-like protein kinase family protein	-
																	HORVU2Hr1G091840.16	receptor-like protein kinase 2 (RLK2)	-
																	HORVU2Hr1G124010.6	receptor-like kinase (RLK)	-
	ata-miR390-3p	GCTATCTATCCTGAGCTCC	19	chr5H	638556917	638557050	CGCTATCTATCCTGAGCTCC	3'	Diff	1	41.93	1.65	9.03189	34.7776	7.57055	4.63877	HORVU4Hr1G053760.1	Trichome birefringence-like 6	-
																	HORVU1Hr1G068940.2	Ribosomal protein L34e superfamily protein	-
MIR393	ata-miR393-5p	TTCCAAAGGGATCGCATTGAT	21	chr2H	756463328	756463424	TTCCAAAGGGATCGCATTGAT	5'	Yes	1.1	196.94	176.66	244.094	493.656	204.499	208.105	HORVU2Hr1G070800.3	HvAFB	+
																	HORVU1Hr1G021550.4	HvTIR1	+
	gma-miR393a	TCCAAAGGGATCGCATTGATCC	22	0	0	0	TCCAAAGGGATCGCATTGATC	5'	Diff	1	78.97	76.4	-	-	169.909	97.4689	HORVU2Hr1G070800.3	HvAFB	+
																	HORVU1Hr1G021550.4	HvTIR1	+
	osa-miR393a-5p	CTTCCAAAGGGATCGCATTGAT	22	chr3H	23852951	23853118	TCCAAAGGGATCGCATTGATC	5'	Diff	0.9	-	-	15.1384	10.468	2.73349	-	HORVU2Hr1G070800.3	HvAFB	+
																	HORVU1Hr1G021550.4	HvTIR1	+
	zma-miR393b-3p	ATCATGCGATCCTTTTGGAAG	21	chr3H	19314673	19314800	ATCAATGCGATCCTTTTGGAGG	3'	Diff	1	-	-	70.8924	213.71	59.6467	166.427	HORVU1Hr1G048580.3	Protein kinase superfamily protein	-
MIR394	ata-miR394-5p	TTGGCATTCTGTCCACCTCC	20	chr6H	438338702	438338816	TTGGCATTCTGTCCACCTCC	5'	Yes	0.8	1226.34	543.11	704.255	1255.54	590.409	380.587	HORVU1Hr1G043940.3	Protein TIC110, chloroplastic	+
																	HORVU6Hr1G018370.1	Calnexin 1	+
MIR395	ata-miR395a-5p	GTTCCCTTCAAGCACTTCAGG	21	chr2H	693848267	693848348	GTTCCCTTCAAGCACTTCAGG	5'	Yes	0.9	72.98	59.76	24.7796	-	20.7956	44.1365	HORVU2Hr1G101510.2	GDSL esterase/lipase	-
	ata-miR395a-3p	TGAAGTGTTTGGGGGAACTC	20	chr2H	693848267	693848348	TGAAGTGTTTGGGGGAACTC	3'	Yes	0.9	25.51	15.67	13.1048	3.15684	11.1465	7.21049	HORVU5Hr1G094300.2	Sulfate adenylyltransferase	+
																	HORVU5Hr1G046830.2	serine/threonine protein kinase 1	+
	ata-miR395d-5p	GTTCCCTTCAAGCACTTTACG	21	chr2H	735081260	735081490	AGTTCCCTTCAAGCACTTTACG	5'	Diff	0.8	17.77	21.94	7.81333	-	6.83372	13.401	HORVU4Hr1G009020.1	Peptidase_C48	-
	bdi-miR395e-5p	GTTCTCCTCAAATCACTTCAGT	22	chr2H	570225442	570225594	GTTCTCCTCAAATCACTTCAGT	5'	Yes	0.9	-	-	4.16711	3.87338	3.64465	11.9904	HORVU3Hr1G052420.1	Magnesium transporter CorA-like family protein	-
	ata-miR395a-5p.3	GTTCTCTTCAAGCACTTCAGGA	22	chr2H	602919898	602919999	GTTCCCTTCAAGCACTTCAGG	5'	Diff	0.9	-	-	17.3103	8.95593	14.5918	11.2851	-
	zma-miR395b-5p	GTTCCCTACAAGCACTTCACAATG	24	chr2H	734860023	734860132	GTTCCCTACAAGCACTTCACAA	5'	Diff	1.2	-	-	4.16711	-	3.64465	-	HORVU5Hr1G017940.1	Disease resistance protein	-
																	HORVU5Hr1G017950.2	Disease resistance protein	-
	bdi-miR395c-5p	GTTCCCTGCAGGCACTTCATG	21	chr2H	735081129	735081265	GTTCCCTGCAAGCACTTCATG	5'	Diff	1	-	-	2.60444	-	2.27791	14.8116	HORVU6Hr1G010140.1	Disease resistance protein RGA2	+
	mtr-miR395h	TGAAGTGTTTGGGGGAACTT	20	chr2H	686637268	686637460	ATGAAGTGTTTGGGGGAACTT	5'	Diff	0.7	15.81	9.75	-	-	-	-	HORVU5Hr1G094300.2	Sulfate adenylyltransferase	+
	ata-miR395a-5p.2	GTTCTCTTCAAGCACTTCAGG	21	chr2H	602869124	602869225	GTTCCCTTCAAGCACTTCAGG	5'	Diff	1	-	-	-	-	21.3383	30.3286	HORVU6Hr1G016750.9	Endoglucanase 11	+
	ata-miR395a-5p.4	AGTTCTCTTCAAGCACTTCAGG	22	chr2H	734457817	734457918	GTTCCCTTCAAGCACTTCAGG	5'	Diff	1	-	-	-	-	3.65124	-	-
MIR396	ata-miR396c-5p	TTCCACAGCTTTCTTGAACTT	21	chr6H	564855019	564855190	TTCCACAGCTTTCTTGAACTT	5'	Yes	1	63.08	62.06	95.9487	55.904	80.4924	5.71575	HORVU7Hr1G008680.14	Growth-regulating factor 5 (GRF5)	+
																	HORVU4Hr1G010080.6	Growth-regulating factor 6 (GRF6)	+
																	HORVU4Hr1G003440.12	Growth-regulating factor 9 (GRF9)	+
	ata-miR396e-5p	TTCCACAGCTTTCTTGAACTG	21	chr7H	49823990	49824095	TTCCACAGCTTTCTTGAACTG	5'	Yes	1.1	2544.07	3619.89	7453.02	11420.2	6263.4	2442.93	HORVU7Hr1G008680.14	Growth-regulating factor 5 (GRF5)	+
																	HORVU4Hr1G010080.6	Growth-regulating factor 6 (GRF6)	+
																	HORVU4Hr1G003440.12	Growth-regulating factor 9 (GRF9)	+
	ata-miR396e-3p	GTTCAATAAAGCTGTGGGAAA	21	chr7H	49823990	49824095		3'	Yes	1.1	-	-	689.943	947.7	588.692	198.681	HORVU2Hr1G087460.1	Nuclear transcription factor Y subunit B-3	-
	ata-miR396c-3p	GGTCAAGAAAGCTGTGGGAAG	21	chr6H	564855019	564855190		3'	Yes	1	-	-	5.38567	-	4.38148	-	HORVU2Hr1G082700.1	NAD(P)-linked oxidoreductase superfamily protein	-
																	HORVU6Hr1G052010.1	Kelch-like protein 21	-
	ata-miR396d-3p	TTCAAGAAAGCCCATGGAAA	20	chr2H	747694763	747694864	GTTCAAGAAAGCCCATGGAAA	3'	Diff	0.8	-	-	14.5849	14.9473	3.64465	-	HORVU3Hr1G070620.18	Auxin-responsive protein IAA6	-
																	HORVU3Hr1G098450.3	receptor kinase 3	-
	gma-miR396a-5p	TTCCACAGCTTTCTTGAACTGT	22	chr7H	49824046	49824170	TTCCACAGCTTTCTTGAACTG	5'	Diff	1.2	-	-	15.2826	25.1538	8.48171	5.56652	HORVU4Hr1G010080.6	Growth-regulating factor 6 (GRF6)	+
																	HORVU7Hr1G008680.14	Growth-regulating factor 5 (GRF5)	+
	ata-miR396a-5p	TCCACAGGCTTTCTTGAACTG	21				TCCACAGGCTTTCTTGAACTG	5'	Yes	0.9	14747	16532	-	-	-	-	HORVU7Hr1G008680.14	Growth-regulating factor 5 (GRF5)	+
																	HORVU4Hr1G010080.6	Growth-regulating factor 6 (GRF6)	+
																	HORVU4Hr1G003440.12	Growth-regulating factor 9 (GRF9)	+
	hvu-miR396a-5p_1	TCCAAAGGCTTTCTTGAACTG	21	chr2H	747500879	747500983		5'	Diff	0.8	-	-	115.787	171.62	-	-	HORVU7Hr1G008680.14	Growth-regulating factor 5 (GRF5)	+
	hvu-miR396d-3p_1	GTTCAAGAAAGCCCATGGAAA	21	chr2H	747500879	747500983		3'	Yes	0.8	-	-	435.888	262.65	-	-	HORVU3Hr1G070620.18	Auxin-responsive protein IAA6	-
	hvu-miR396a-5p_2	TCCACAGGCTTTCTTGAACTT	21	chr2H	747694891	747695053		5'	Diff	0.8	-	-	132.288	222.806	-	-	HORVU4Hr1G010080.6	Growth-regulating factor 6 (GRF6)	+
																	HORVU7Hr1G008680.14	Growth-regulating factor 5 (GRF5)	+
	hvu-miR396f	TTCCACAGCTTTCTTGAACAG	21	chr7H	49824047	49824171		5'	Diff	1.2	-	-	-	7.72606	-	-	HORVU4Hr1G010080.6	Growth-regulating factor 6 (GRF6)	+
																	HORVU7Hr1G008680.14	Growth-regulating factor 5 (GRF5)	+
	ata-miR396a-5p	TCCTCAGGCTTTCTTGAACTG	21	chr2H	747694763	747694864	TCCACAGGCTTTCTTGAACTG	5'	Diff	0.8	-	-	-	-	26.9056	10.0209	-
	ata-miR396a-5p.2	CACAGGCTTTCTTGAACTG	19	chr2H	747501007	747501169	TCCACAGGCTTTCTTGAACTG	5'	Diff	0.8	-	-	-	-	548.537	188.248	HORVU2Hr1G055230.4	Basic leucine-zipper 8	+
	ata-MIR396d-3p	AAAGCCCATGGAAACCATGCC	21	chr2H	747501007	747501169	AAAGCCCATGGAAAccatgcc	3'	New	0.8	-	-	-	-	18.2298	12.6197	-
MIR396_2	osa-miR396d	TCCACAGGCTTTCTTGAACGG	21	chr6H	544655866	544655962	TCCACAGGCTTTCTTGAACGG	3'	Yes	0.6	21.25	34.05	-	-	-	-	HORVU7Hr1G008680.14	Growth-regulating factor 5 (GRF5)	+
																	HORVU4Hr1G010080.6	Growth-regulating factor 6 (GRF6)	+
																	HORVU4Hr1G003440.12	Growth-regulating factor 9 (GRF9)	+
MIR397	hvu-MIR397a-3p	TCACCGGCGCTGCACGCAATG	21	chr6H	95336398	95336510	tcaccggcgctgcacgcaatg	3'	New	1	3.92	6.3	-	170.269	-	-	HORVU6Hr1G025830.1	Wound-responsive family protein	-
																	HORVU2Hr1G032890.2	Cytochrome P450 superfamily protein	-
	hvu-MIR397b-5p	TGCAGCGCCGGTGAACCGCTCC	22	chr6H	95336399	95336505	tgcagcgccggtgaaccgctcc	5'	New	0.9	29.91	28.16	22.0867	65.5784	18.6048	29.3573	HORVU5Hr1G026690.1	Late embryogenesis abundant (LEA) hydroxyproline-rich glycoprotein family	-
	hvu-MIR397a-5p	TTGAGTGCAGCGTTGATGAAC	21	chr6H	95336398	95336510	TTGAGTGCAGCGTTGATGaac	5'	New	1	-	-	22.8402	1114.85	19.1542	17.7413	HORVU3Hr1G086160.1	laccase 17	+
	hvu-MIR397b-3p	ACGGTTCATCAACGCTGCACT	21	chr6H	95336399	95336505	acggttcATCAACGCTGCACT	3'	New	0.9	-	-	4.48806	8.85496	3.65124	4.2319	HORVU1Hr1G005110.1	-	-
	hvu-MIR397a-5p	TGCAGCGTTGATGAACCGTCCGGC	24	chr6H	95336398	95336510	TGCAGCGTTGATGaaccgtccggc	5'	New	1	42.28	15.82	-	-	-	-	HORVU6Hr1G025830.1	Wound-responsive family protein	-
MIR398	ahy-miR398	TGTTTTCTCAGGTCACCCCTT	21				TGTGTTCTCAGGTCACCCCT	3'	Diff	1.3	1.71	0.82	-	-	-	11.9144	-
	hvu-miR398g-5p	GGGTCGAACTGGGAACAC	18	chr3H	637805891	637806005		5'	Diff	1	-	-	-	6.29425	-	-	HORVU6Hr1G080690.1	Protein of unknown function (DUF1685)	+
	hvu-miR398	TGTGTTCTCAGGTCGCCCCCA	21	chr3H	637805891	637806005		3'	Diff	1	-	-	-	9.66275	-	-	HORVU3Hr1G092320	Integrator complex subunit 9 homolog	-
MIR399	ata-miR399a-3p	TGCCAAAGGAGAATTGCCCTG	21				TGCCAAAGGAGAATTGCCCTG	3'	Yes	0.9	10.09	10.3	8.511	-	7.11497	-	HORVU2Hr1G114260.1	Glycerol kinase	-
																	HORVU3Hr1G116800.1	MADS-box transcription factor family protein	-
MIR408	tae-miR408	TGCACTGCCTCTTCCCTGGC	20	chr7H	622016748	622016961	CTGCACTGCCTCTTCCCTGGC	3'	Diff	0.8	66.66	9.36	-	-	-	-	HORVU7Hr1G107070.1	Sec14p-like phosphatidylinositol transfer family protein	+
MIR444	hvu-MIR444b-3p	GCATGAGGCAACAACTGCAGT	21	chr6H	470600797	470600874	gcatgaggcaacaactgcatt	3'	New	0.6	-	-	112.75	212.646	104.333	74.0471	HORVU6Hr1G050160.7	GTP binding Elongation factor Tu family protein	-
	hvu-miR444b-3p	TGCAGTTGCTGTCTCAAGCTT	21	chr7H	123465182	123465222	TGCAGTTGCTGTCTCAAGCTT	3'	Yes	0.6	-	-	109.369	119.451	91.4897	91.0451	HORVU2Hr1G080490.1	MADS-box transcription factor 27	+
																	HORVU7Hr1G066380.4	Zinc finger (C3HC4-type RING finger) family protein	+
																	HORVU7Hr1G023940.2	MADS-box transcription factor 25	+
	hvu-MIR444b-3p.3	GCATGAGGCAACAACTGCATT	21	chr7H	169657756	169657808	gcatgaggcaacaactgcatt	3'	New	0.7	-	-	16.036	12.8293	13.5869	17.9638	-
	hvu-miR444a	TTGTTGTCTCAAGCTTGCTGCC	22	chr2H	583383325	583383481	TTGCTGCCTCAAGCTTGCTGC	3'	Diff	0.6	1868.33	1618.47	-	-	-	-	HORVU2Hr1G080490.1	MADS-box transcription factor 27	+
	osa-miR444a-3p.2	TGCAGTTGCTGCCTCAAGCTT	21				TGCAGTTGCTGCCTCAAGCTT	3'	Yes	1.5	3660.48	3311.64	-	-	-	-	HORVU2Hr1G080490.1	MADS-box transcription factor 27	+
	osa-MIR444c-3p	CGGCAAGCTAGAGACAGCAAC	21	chr2H	583386625	583386768	cggcaagctagagacagcaac	3'	New	0.4	788.08	466.83	-	-	-	-	-
	hvu-miR444b_2	TGCAGTTGCTGCCTCAAGCTTT	22	chr6H	40455555	40455614		3'	Diff	0.5	-	-	287.602	122.418	-	-	HORVU5Hr1G000370.3	MADS-box transcription factor 25	+
																	HORVU7Hr1G066380.4	zinc finger (C3HC4-type RING finger) family protein	+
	hvu-MIR444b-5p	TTTCTTGCAAGTTGTGCAGT	20	chr7H	123465182	123465222		5'	New	0.6	-	-	7.61339	10.2868	-	-	HORVU1Hr1G076660.1	O-methyltransferase family protein	+
																	HORVU2Hr1G080490.1	MADS-box transcription factor 27	+
	hvu-miR444a-3p	TTGCTGCCTCAAGCTTGCTGC	21	chr6H	507076616	507076691	TTGCTGCCTCAAGCTTGCTGC	3'	Yes	0.6	-	-	-	-	129.872	60.2012	HORVU2Hr1G080490.1	MADS-box transcription factor 27	+
																	HORVU3Hr1G030980.2	Chaperone protein DnaK	+
	hvu-MIR444a-5p	AAGTCGTGCAGTTGCTGCCTC	21	chr6H	507076616	507076691	aagtcgtgcagTTGCTGCCTC	5'	New	0.6	-	-	-	-	704.282	301.049	HORVU1Hr1G092690.1	Zinc finger (C3HC4-type RING finger) protein family-like	-
																	HORVU2Hr1G080490.1	MADS-box transcription factor 27	-
	hvu-MIR444b-3p.2	GAGGCAACAACTGCATTACTT	21	chr7H	123467618	123467671	gaggcaacaactgcattactt	3'	New	0.7	-	-	-	-	13.5869	17.9638	-
MIR477	vvi-miR477a	TTCTCCCTCAAAGGCCTCCAA	21	chr7H	228012289	228012369	ATCTCCCTCAAAGGCTTCCAA	5'	Diff	0.9	40.81	58.36	-	-	-	-	HORVU1Hr1G050450.2	Replication factor C subunit 5	-
	ppt-miR477h	TTCTCCCTCAAAGGCCTCCAAC	22				TCTCCCTCAAAGGCTTCCA	5'	Diff	0.7	76.22	192.47	-	-	-	-	HORVU1Hr1G050450.2	Replication factor C subunit 5	-
MIR528	ata-miR528-5p	TGGAAGGGGCATGCAGAGGAG	21				TGGAAGGGGCATGCAGAGGAG	5'	Yes	0.8	23.98	16.52	-	-	-	-	HORVU7Hr1G060130.2	Superoxide dismutase [Cu-Zn] 4A	-
MIR530	osa-miR530-5p	CTGCATTTGCGCCTGCACCTA	21				TGCATTTGCACCTGCACCTA	5'	Diff	1.1	8.23	4.2	-	-	-	-	HORVU4Hr1G020970.1	Receptor kinase 3	-
MIR812	osa-MIR812q-3p	ACTTATTTTGGGACGGAGGGA	21	chr1H	145921075	145921192	acttattttgggacggaggta	3'	New	1.2	1.52	3.15	2.60444	-	-	-	HORVU3Hr1G079340.5	Leucine-rich repeat protein kinase family protein	-
																	HORVU4Hr1G050360.3	Lung seven transmembrane receptor family protein	-
																	HORVU5Hr1G011020.9	Release factor glutamine methyltransferase	-
																	HORVU6Hr1G045360.5	Protein kinase superfamily protein	-
MIR818	osa-MIR1439-3p	ATATTTTGGAACGGAGGGAGT	21	chr2H	12627984	12628134	ataTTTTGGAACGGAGTGAGT	3'	New	1.2	1.85	3.54	-	-	-	-	-
	tae-MIR1130b-3p	TATATTATGGGATGGAGGGAG	21	chr3H	211524768	211524857	TATATTATGGGACGGAGGgag	3'	New	1.6	-	-	2.60444	1.91599	2.27791	-	HORVU3Hr1G071430.2	Protein kinase superfamily protein	+
MIR827	osa-miR827	TTAGATGACCATCAGCAAACA	21	chr2H	620316270	620316436	TTAGATGACCATCAGCAAACA	3'	Yes	1	571.62	415.54	-	-	340.448	79.1307	HORVU6Hr1G065710.13	SPX domain-containing membrane protein	-
																	HORVU7Hr1G025110.3	ABC transporter C family member 10	-
	hvu-miR827-5p	TTTTGTTGGTTGTCATCTAACC	22	chr2H	620316283	620316424		5'	Yes	1	-	-	13.9525	17.0238	-	-	-
	hvu-miR827	CTTAGATGACCATCAGCAAACA	22	chr2H	620316283	620316424		3'	Diff	1	-	-	-	10.1858	-	-	-
	osa-miR827-3p.2	TAGATGACCATCAGCAAACA	20	chr2H	620316285	620316424	TTAGATGACCATCAGCAAACA	3'	Diff	1	-	-	-	-	5.01139	-	-
MIR1120	hvu-miR1120-3p	TTCTTATATTATGGGACGGAG	21	chr6H	397640334	397640417	ACATTCTTATATTATGGGACGGAG	3'	Diff	1.4	34.86	23.53	21.1007	34.6534	17.9618	16.8136	HORVU3Hr1G083110.1	like COV 2	+
	hvu-MIR1120c-5p	TCTGTCCCATAATATAAGAAC	21	chr1H	417350530	417350608		5'	New	1.8	-	-	-	2.29919	-	-	HORVU7Hr1G051710.9	Glycogen debranching enzyme	-
	hvu-MIR1120a-5p	TCCGTCCCATAATATAAGAGC	21	chr3H	63623326	63623415		5'	New	1.8	-	-	23.2169	26.1428	-	-	HORVU5Hr1G093960.16	basic helix-loop-helix (bHLH) DNA-binding superfamily protein	-
																	HORVU7Hr1G051710.9	Glycogen debranching enzyme	-
	tae-MIR1121-3p	TATATTTCTTTACGGAGGGAG	21	chr2H	274044306	274044400	TAtatttctttacggagggag	3'	New	1.9	-	-	7.61339	19.6673	6.38472	-	HORVU1Hr1G035390.1	Glucose-repressible alcohol dehydrogenase transcriptional effector	+
																	HORVU1Hr1G001890.20	Tubulin-specific chaperone E	+
	tae-MIR1121-5p	TACACCCTCTGTAAAGAAATA	21	chr2H	274044306	274044400	tactccctctgtaaagaaata	5'	New	1.9	3.7	1.89	-	-	-	-	HORVU6Hr1G066890.1	AP-2 complex subunit mu	+
	tae-MIR1121-3p	TTTCTTTACGGAGGGAGTACA	21	chr2H	693800099	693800191	tttctttacggagggagtact	3'	New	2.2	2.03	-	-	-	-	-	HORVU3Hr1G065260.19	Lipid A export ATP-binding/permease protein MsbA	-
	tae-MIR1122a-5p	ATTTTGGGACGGAGGGAGTAT	21	chr7H	191761974	191762264	attttgggacggagggagtat	5'	New	1.4	63.2	27.22	14.2408	13.9996	12.1264	7.05317	HORVU4Hr1G003100.5	aminopeptidase M1	+
																	HORVU7Hr1G050390.9	tRNA (cytidine(34)-2'-O)-methyltransferase	+
	tae-MIR1122c-3p	ATATTATGGGACGGAGGGAGT	21	chr2H	263808385	263808473	ATATTATGGGACGGAGGgagt	3'	New	1.8	-	-	22.1983	45.3259	19.141	20.2642	HORVU4Hr1G071380.1	N-acetyltransferase 9-like protein	+
	tae-MIR1122a-3p.6	TATATTTAGGAACGGAGG	18	chr7H	191761974	191762264	tatatttaggaacagagg	3'	New	1.4	-	-	6.33906	5.69875	5.37981	9.16912	HORVU4Hr1G064090.9	unknown protein; Has 30 Blast hits to 30 proteins in 10 species: Archae - 0; Bacteria - 0; Metazoa - 0; Fungi - 0; Plants - 30; Viruses - 0; Other Eukaryotes - 0 (source: NCBI BLink).	+
	tae-MIR1122a-3p.12	CAAGAATTTTGGGACGGAGGG	21	chr2H	36014756	36014897	caagaattttgggacggaggg	3'	New	1.7	-	-	2.60444	-	2.27791	-	HORVU4Hr1G081570.6	zinc induced facilitator-like 1	+
	tae-MIR1122a-3p.7	AAGACAAGAATTTTGGGACGG	21	chr5H	146159745	146159878	aagacaagaattttgggacgg	3'	New	1.7	-	-	2.60444	-	2.27791	-	HORVU4Hr1G081570.6	Zinc induced facilitator-like 1	+
	tae-MIR1122c-3p	TATTATGGGACGGAGGGAGTT	21	chr2H	263808385	263808473	TATTATGGGACGGAGGgagta	3'	New	1.8	58.66	30.67	-	-	-	-	-
MIR1122	far-MIR1122-3p	AAGTTGAGACAGTTATTT	18	chr7H	651522216	651522318	aagttgagacacttattt	3'	New	1.6	4.84	-	-	-	-	-	HORVU5Hr1G067720.3	Annexin 8	-
	tae-MIR1122a-3p	GTATATAGACATACTTTAGAGTGT	24	chr7H	191761974	191762264	gtatatagacatattttagagtgt	3'	New	1.4	9.05	21.5	-	-	-	-	-
	hvu-miR1122b-3p	AGACTTATATTTAGGAACGGA	21	chr7H	207068280	207068441		3'	Diff	1.5	-	-	156.96	182.635	-	-	HORVU1Hr1G093430.8	BnaC06g06240D protein	+
	hvu-MIR1122a-3p_8	AGACAAGATTTTTGGGACGGA	21	chr2H	710088359	710088506		3'	New	1.5	-	-	-	2.90504	-	-	HORVU4Hr1G081570.6	zinc induced facilitator-like 1	+
	hvu-MIR1122a-3p_6	TATTTAGGAACAGAGGTTGTA	21	chr3H	2526088	2526197		3'	New	1.5	-	-	-	7.32216	-	-	HORVU1Hr1G048620.5	26S proteasome subunit RPN7	+
																	HORVU3Hr1G051800.2	Grain length protein	+
																	HORVU1Hr1G048620.1	COP9 signalosome complex subunit 1	+
	tae-MIR1122a-3p	AAGAATTTTGGGACGGAGGGA	21	chr5H	118570734	118570869	aagaattttgggacggaggga	3'	New	1.5	-	-	-	-	2.27791	-	HORVU4Hr1G081570.6	Zinc induced facilitator-like 1	+
	tae-MIR1122a-3p.8	AAGACAAGAATTTTGGGACGGAGG	24	chr2H	190551425	190551597	aagacaagaattttgggacggagg	3'	New	1.6	-	-	-	-	2.27791	-	-
	tae-MIR1122a-3p.9	ACAAGAATTTTGGGACGGAGG	21	chr6H	174006333	174006466	acaagaattttgggacggagg	3'	New	1.7	-	-	-	-	2.27791	-	-
	tae-MIR1122a-3p.10	AGAATTTTGGGACGGAGGGAG	21	chr3H	570003490	570003645	agaattttgggacggagggag	3'	New	1.5	-	-	-	-	2.27791	-	-
	tae-MIR1122a-3p.11	AGACAAGAATTTTGGGACGGA	21	chr4H	562327030	562327176	agacaagaattttgggacgga	3'	New	1.2	-	-	-	-	2.27791	-	-
	tae-MIR1122a-3p.13	CAAGAATTTTGGGACGGAGGGAGT	24	chr7H	652907871	652908030	caagaattttgggacggagggagt	3'	New	1.3	-	-	-	-	2.27791	-	-
	tae-MIR1122b-3p	ATATTTAGGAACGGAGGGAGT	21	chr7H	207068280	207068441	ATATGTAGGAACGGAgggagt	3'	New	1.5	-	-	-	-	134.375	202.208	HORVU2Hr1G079230.8	Ubiquitin carboxyl-terminal hydrolase 4	-
																	HORVU3Hr1G095200.15	MADS-box transcription factor family protein	-
	tae-MIR1127b-5p	TCCGTCCGGAAATACTTGTCC	21	chr3H	57888227	57888337	tctgtccggaaatacttgtcc	5'	New	1.4	12.66	5.82	14.4733	8.39148	12.2201	9.79842	HORVU2Hr1G002800.1	Serine/threonine-protein kinase	-
																	HORVU5Hr1G115500.3	High-affinity nitrate transporter 3.1	-
	tae-MIR1127b-3p	AGTATTTCCGGACGGAGGGAG	21	chr3H	57888227	57888337	AGTATTTCTGGACGGAGGgag	3'	New	1.4	9.51	31.38	15.9476	12.1018	-	-	HORVU2Hr1G002800.1	Serine/threonine-protein kinase	-
																	HORVU3Hr1G067300.1	Demethylmenaquinone methyltransferase	-
																	HORVU7Hr1G078210.6	UDP-Glycosyltransferase superfamily protein	-
	tae-miR1127b-3p	ACAAGTATTTCCGGACGGAGG	21	chr3H	57888227	57888337	ACAAGTATTTCTGGACGGAGG	3'	Diff	1.4	-	-	-	-	13.674	8.16535	-
	tae-MIR1128-5p	CTCCGTCCGGAAATACTTGTC	21	chr1H	102345721	102345840	CTCCGTCCGAAAatacttgtc	5'	New	1.6	-	-	8.88773	1.91599	7.38964	-	HORVU2Hr1G002800.1	Serine/threonine-protein kinase	-
																	HORVU3Hr1G067300.1	Demethylmenaquinone methyltransferase	-
																	HORVU5Hr1G115500.3	High-affinity nitrate transporter 3.1	-
	tae-MIR1128-3p	ATTTCCGGACGGAGGGAGTAG	21	chr2H	26376360	26376482	atttccggacggagggagtaa	3'	New	1.5	2.91	1.65	-	-	-	-	HORVU0Hr1G003490.2	Sterile alpha motif (SAM) domain-containing protein	-
MIR1432	ata-miR1432-5p	ATCAGGAGAGATGACACCGGC	21	chr2H	166777040	166777146	TCAGGAGAGATGACACCGACG	5'	Diff	1	266.43	90.32	121.261	120.989	102.055	182.427	HORVU1Hr1G094160.1	Calmodulin like 43	+
																	HORVU5Hr1G111520.1	EF hand calcium-binding protein family	+
	ata-MIR1432-3p	GGTGTCAGCTCGCCTGAACA	20	chr2H	166777040	166777146	GGTGTCACCTCGCCTGAACa	3'	New	1	19.44	14.94	-	-	4.38148	18.1482	HORVU3Hr1G000350.4	Protein kinase superfamily protein	-
	osa-miR1432-5p	TCAGGAGAGATGACACCGACA	21	chr2H	166771848	166771964	ATCAGGAGAGATGACACCGAC	5'	Diff	1.1	648.92	496.88	-	-	-	-	HORVU5Hr1G111520.1	EF hand calcium-binding protein family	-
	hvu-miR1432-3p_2	GGTGTCAGCTCGCCTGAAC	19	chr2H	166777040	166777146		3'	Diff	1	-	-	5.38567	24.2475	-	-	HORVU1Hr1G002960.1	Chromosome 3B, genomic scaffold, cultivar Chinese Spring	-
																	HORVU2Hr1G023350.3	Protein transport protein SEC31 homolog B	-
MIR1511	ppe-miR1511-3p	AACCTGGCTCTGATACCA	18				ACCTGGCTCTGATACCATAAC	3'	Diff	1.1	11.15	12.28	-	-	-	-	HORVU5Hr1G037600.7	Chaperone protein DnaJ	+
MIR1862	osa-MIR1862d-3p	TTATTTTGGGACGGAGGGAGT	21	chrUn	139117390	139117492	TTATTTTGGGACGgagggagt	3'	New	1.5	10.9	7.55	-	-	2.27791	-	-
MIR1878	bdi-miR1878-3p	ATTTGTAGTGTTCGGATTGAGTTT	24				ATTTGTAGTGTTCAGATTGAGTTT	3'	Diff	1.4	36.53	52.67	-	-	101.292	62.4311	HORVU6Hr1G018420.3	Calnexin 1	+
	hvu-miR1878-3p	TTGTAGTGTTCGGATTGAGTT	21	chr5H	479890824	479890953		3'	Diff	1.3	-	-	7.61339	7.24189	-	-	HORVU6Hr1G018420.3	calnexin 1	+
MIR2118	osa-MIR2118e-3p	GAAAAGAGAGTCAAAGAG	18	chr7H	621953005	621953031	gaaaagagagtctaagag	3'	New	0.6	16.32	9.91	-	-	-	-	-
MIR3630	han-miR3630-3p	GGAATCTCTCTGATGTTT	18	chr1H	550558104	550558241	TGTGGGAATCTCTCTGATGCTT	5'	Diff	0.6	23.67	3.54	-	-	-	-	HORVU5Hr1G115530.2	Putative methyltransferase family protein	+
MIR5048	hvu-miR5048a	TATATTTGCAGGTTTTAGGTCT	22	chr7H	550741310	550741653	TATTTGCAGGTTTTAGGTCTAA	5'	Diff	0.9	2026.2	2600.64	2391.87	2434.05	2036.5	2291.95	HORVU7Hr1G065130.1	Receptor kinase 2	+
																	HORVU7Hr1G043150.1	Protein kinase superfamily protein	+
	hvu-MIR5048b-3p	ACCTAGACATGCAAGTATATT	21	chr7H	550741310	550741653	acctagacatgcaagtatatt	3'	New	0.9	96.23	129.46	69.3298	155.353	-	-	-
	hvu-MIR5048b-3p	AGACCTAGACATGCAAGTATA	21	chr7H	550741310	550741653	agacctagacatgcaagtata	3'	New	0.9	-	-	-	-	58.2799	145.235	-
MIR5050	hvu-MIR5050-5p	TTGAACGACCTCACCATGTCG	21	chr7H	31280020	31280135	ttgaacgacctcaccatgtcg	5'	New	0.7	1.52	-	-	-	-	-	HORVU3Hr1G093350.2	Selenium-binding protein 1	-
MIR5067	hvu-miR5049b	AAGTATTTAGGTACAGAGGGA	21	chr4H	384820137	384820233	AGTATTTAGGTACAGAGGGAG	3'	Diff	1.2	34.79	31.42	15.1058	35.9351	13.2119	36.188	HORVU5Hr1G077450.7	Receptor kinase 2	+
																	HORVU6Hr1G021780.2	Disease resistance protein	+
																	HORVU3Hr1G049720.2	Mitochondrial substrate carrier family protein	+
	hvu-miR5049e	AATTATTTAGGTACAGAGGGA	21	chr4H	145115347	145115444	AATTATTTAGGTACAGAGGGA	3'	Yes	1.5	40.28	47.77	29.6117	41.8229	25.0767	24.3496	HORVU6Hr1G080670.1	BZIP transcription factor 27	+
																	HORVU6Hr1G021780.2	Disease resistance protein	+
																	HORVU3Hr1G049720.2	Mitochondrial substrate carrier family protein	+
	hvu-miR5049c-3p	ACAGTTATTTTGGGACGGAGG	21	chr7H	5392316	5392423	AGACAATTATTTTGGGACGGAGG	3'	Diff	1.1	-	-	10.9713	20.2318	9.21196	12.1368	HORVU1Hr1G087100.4	Protein DEHYDRATION-INDUCED 19	-
																	HORVU3Hr1G087940.4	Thioredoxin superfamily protein	-
	hvu-MIR5049d-5p	TTATTTAGGAACGGAGGGAGT	21	chr2H	22593760	22593901	TTATTTAGGAACGGAGggaga	5'	New	0.6	-	-	7.0925	8.10926	5.92914	-	HORVU5Hr1G071080.10	Cellulose synthase-like protein E6	+
																	HORVU5Hr1G082940.4	exoribonuclease 2	+
	hvu-MIR5049a-5p	GTTGTTGGGGAGAACTAGACTAGT	24	chr2H	198215353	198215435	GTTGTTGGGgagaactagactagt	5'	New	1.5	24.31	22.11	-	-	-	-	HORVU7Hr1G108220.1	Peroxidase superfamily protein	-
																	HORVU5Hr1G112710.1	Leucine-rich repeat-containing protein 49	-
	hvu-MIR5049a-3p	AAGTATTGTGGTACAGAGGGA	21	chr2H	198215353	198215435	aagtattgtggtacggaggga	3'	New	1.5	9.71	5.82	-	-	-	-	HORVU7Hr1G108220.1	Peroxidase superfamily protein	+
	hvu-MIR5049c-5p	GTCTCAACTTTGTACTAGCTCTAG	24	chr7H	5392316	5392423	gtctcaaccttgtactagctctag	5'	New	1.1	5.22	5.27	-	-	-	-	HORVU7Hr1G081140.2	Transducin/WD-like repeat-protein	+
																	HORVU3Hr1G054200.1	Protein kinase-like protein SCY1	+
	hvu-MIR5049c-3p	TTTTGGGACGGAGGGAGTATT	21	chr7H	5392316	5392423	TTTTGGGACGGAGGaagtatt	3'	New	1.1	38.45	25.72	-	-	-	-	HORVU2Hr1G070360.3	Hydroxysteroid dehydrogenase 1	+
	hvu-MIR5049e-5p	TCCTCCGTTCCTAAATAATTG	21	chr4H	145115347	145115444	tcctccgtccctaaataattg	5'	New	1.5	-	1.65	-	-	-	-	HORVU7Hr1G075760.3	L-gulonolactone oxidase 2	+
																	HORVU2Hr1G007170.3	Disease resistance protein	+
	hvu-MIR5049f-3p	AATATGGATCGGAGGGAGTAA	21	chr1H	328002646	328002761	AATATGGATCGGAGGGAgtac	3'	New	1.3	6.19	6.93	-	-	-	-	HORVU5Hr1G063530.1	Glutamate receptor 1.3	-
																	HORVU1Hr1G005710.8	Disease resistance protein	-
	hvu-MIR5049a-5p	CCCTCTGTACCTAAATACTTG	21	chr2H	198215353	198215435		5'	New	1.5	-	-	-	2.90504	-	-	HORVU3Hr1G049720.2	Mitochondrial substrate carrier family protein	-
	hvu-MIR5049b-5p	TAGTTGGGGGCACTTGTATTC	21	chr4H	384820137	384820233	tagttgggggcacttgtatta	5'	New	1.2	-	-	-	-	-	40.0454	-
MIR5084	ata-MIR5084-3p	ACGGTACTGCAGAGGATCTCAACC	24	chr4H	86904945	86905061	ACGGTACTGCAGAGGATCtcaacc	3'	New	1	2.77	5.98	-	-	-	-	HORVU2Hr1G124810.1	Subtilisin-like protease	-
MIR5200	tae-MIR5200-3p	TAGATACTCTCTAAGGCTTGG	21	chr7H	39465958	39466051	TAGATACTCCCTAAGGCTTgg	3'	New	0.8	29.44	24.94	51.9636	90.041	43.4201	27.7622	HORVU5Hr1G105340.1	UDP-Glycosyltransferase superfamily protein	+
MIR6201	hvu-miR6201	TGACCCTGAGGCACTCATACCG	22	chr6H	578969494	578969601	TGACCCTGAGGCACTCATACCG	5'	Yes	1.2	2.91	5.5	-	13.4947	-	-	-
	hvu-MIR6201-3p	TATGAGTGTCTCAGGGTCAAA	21	chr6H	578969494	578969601		3'	New	1.2	-	-	-	4.82103	-	-	HORVU5Hr1G058760.1	RING/U-box superfamily protein	-
MIR7757	tae-miR7757-5p	ACAAAACCTTCAGCTATCCATC	22				ATAAAACCTTCAGCTATCCATC	5'	Diff	0.9	20713.4	32669	-	-	-	-	HORVU5Hr1G086040.7	NBS-LRR disease resistance protein, putative	+
MIR8005	stu-MIR8005a-3p	TTTAGGGTTTAGGGTTTAGGG	21	chr2H	721188029	721188104	gttagggtttagggtttaggg	3'	New	0.7	3.24	-	-	-	-	-	HORVU2Hr1G096300.1	Lysine-specific histone demethylase 1 homolog 3	-
MIR9662	tae-miR9662a-3p	TTGAACATCCCAGAGCCACCG	21	chr6H	104007288	104007383	TTGAACATCCCAGAGCCACCG	3'	Yes	1	10453.3	7790.67	9480.85	7426.14	7986.57	6888.87	HORVU5Hr1G109600.1	Mitochondrial transcription termination factor family protein	+
																	HORVU7Hr1G037730.1	Mitochondrial transcription termination factor family protein	+
	tae-MIR9662a-5p	GCGGCTCTGTGGTGTTCAAGC	21	chr6H	104007288	104007383	gcggctctgtggtgttcaagc	5'	New	1	911.9	699.23	212.733	476.486	179.208	277.958	HORVU5Hr1G123930.2	Beta-fructofuranosidase, insoluble isoenzyme 3	-
																	HORVU2Hr1G100080.7	Protein strawberry notch homolog 1	-
MIR9863	ata-miR9863a-3p	TGAGAAGGCAGATCATAATAGC	22	chr1H	39912321	39912546	TGAGAAGGTAGATCATAATAGC	3'	Diff	1	7009.42	9702.03	-	-	-	-	HORVU1Hr1G004080.7	Disease resistance protein	+
																	HORVU7Hr1G023820.2	Disease resistance protein	+
																	HORVU3Hr1G105020.39	Disease resistance protein	+
																	HORVU3Hr1G104770.5	Disease resistance protein	+
	ata-MIR9863a-5p	TCTGAAGACTAGTTTATTATA	21	chr1H	39912321	39912546	TCtgaagactagtttattaca	5'	New	1	215.22	322.46	-	-	-	-	HORVU5Hr1G007750.22	FAR1-related sequence 3	-
																	HORVU1Hr1G004650.4	Purple acid phosphatase 22	-
Unknown	ppt-miR894	TTCACGTCGGGTTCACCA	18				CGTTTCACGTCGGGTTCACC	5'	Diff	0.5	807.53	797.83	-	-	-	-	HORVU7Hr1G041460.1	2-oxoglutarate (2OG) and Fe(II)-dependent oxygenase superfamily protein	+
	cre-MIR909-5p	CCACCACCACCACCACCCG	19	chr1H	22018404	22018504	ccaccaccaccaccaccgg	5'	New	0.7	3.41	-	-	-	-	-	HORVU3Hr1G093400.1	RNA-binding protein 1	+
																	HORVU4Hr1G059090.11	THO complex subunit 4A	+
	smo-MIR1103-5p	TGACCTCCTGGGAAGTCC	18	chrUn	148159101	148159136	tgacctcccgggaagtcc	5'	New	0.3	4.05	1.89	-	-	-	-	-
	smo-MIR1103-3p	TGGGTGACCTCCTGGGAA	18	chrUn	191569704	191569730	tgggtgacctcccgggaa	3'	New	0.9	4.84	-	-	-	-	-	HORVU1Hr1G055630.2	Palmitoyl-protein thioesterase 1	+
	hvu-MIR1436-3p	ATTTTGGGACGGAGGGAGTAC	21	chr4H	583751438	583751528	ATTATGGGACGGAGGGAGTac	3'	New	0.9	18.32	14.4	7.29244	7.12022	6.37814	-	HORVU5Hr1G058240.10	Leucine zipper protein-like	+
																	HORVU5Hr1G067720.3	Annexin 8	+
																	HORVU4Hr1G003100.5	aminopeptidase M1	+
																	HORVU7Hr1G050390.9	tRNA (cytidine(34)-2'-O)-methyltransferase	+
																	HORVU1Hr1G048620.1	COP9 signalosome complex subunit 1	+
																	HORVU4Hr1G071380.1	N-acetyltransferase 9-like protein	+
	peu-MIR2916-5p	TACCGTCCTAGTCTCAACCATA	22	chr2H	187549098	187549188	Taccatcctagtctcaaccata	5'	New	0.5	7635.03	16622.5	906.453	3024.56	769.668	10661	HORVU0Hr1G023930	Senescence-associated protein	-
																	HORVU5Hr1G015600	Cytochrome P450 likeTBP	-
	peu-MIR2916-3p	AGGGATCGGCGGATGTTGCT	20	chr2H	187549098	187549188	agggattggcggatgttgct	3'	New	0.5	-	-	3763.47	8110.85	3192.99	22917.5	HORVU5Hr1G077200.2	Pyruvate dehydrogenase E1 component subunit beta	+
	peu-MIR2916-3p	CGATGCCGACCAGGGATCGGCGGA	24	chr2H	187549098	187549188	cgatgccgaccagggattggcgga	3'	New	0.5	6502.3	11108.8	-	-	-	-	HORVU2Hr1G072960.1	Senescence-associated protein	-
	gma-miR4995	GCAGTGGCTTGGTTAAGGGA	20				AGGCAGTGGCTTGGTTAAGGG	5'	Diff	0.5	7.99	2.2	-	-	-	-	HORVU2Hr1G043260.1	Protein kinase	-
	hvu-miR5051	TTTGGCACCTTGAAACTGGGA	21	chr4H	588904634	588904738	TTTGGCACCTTGAAACTGGGA	3'	Yes	1.2	279.12	287.14	275.868	287.848	232.289	201.28	HORVU7Hr1G054660.6	Chromosome 3B, genomic scaffold, cultivar Chinese Spring	-
																	HORVU4Hr1G083260.5	DnaJ homolog subfamily B member 4	-
	hvu-MIR5051-5p	CCAGTTTCAAGGTTTCAAAGC	21	chr4H	588904634	588904738	ccagtttcaaggtttcaaagc	5'	New	1.2	-	-	4.688	10.7709	4.10023	6.34785	HORVU5Hr1G052150.3	Indole-3-glycerol phosphate synthase	-
	bdi-miR5054	TCCCCACGGTCGGCGCCA	18				TCCCCACGGTCGGCGCCA	3'	Yes	0.5	106.14	26.98	-	-	-	-	HORVU4Hr1G003990.3	RNA-binding protein 1	+
																	HORVU6Hr1G088580.4	Zinc finger (C3HC4-type RING finger) family protein	+
	osa-miR5072	TCCCCAGCGGAGTCGCCA	18				CGATTCCCCAGCGGAGTCGCCA	5'	Diff	0.5	248.26	107.43	-	-	-	-	HORVU3Hr1G075970.2	Pectate lyase family protein	-
	osa-miR5077	TTCCCGTCGGGTTCACCA	18				GTTCGCGTCGGGTTCACCA	5'	Diff	0.5	3.73	-	-	-	-	-	HORVU6Hr1G078650.2	Fucosyltransferase 1	+
	osa-miR5082	GCGATGATGGCCGCGCGGGCTCA	23				TGCGATGATGGCCGCGCGGGTTCA	3'	Diff	0.8	12.02	85.81	-	-	-	-	HORVU1Hr1G076490.1	Ovate family protein 4	-
	osa-miR5083	ACAGACTACAATTATCTGATCA	22				AGACTACAATTATCTGATCA	3'	Diff	0.7	1036.43	1129.54	-	-	-	-	-
	rgl-miR5139	AACCTGGCTCTGATACCA	18				AAACCTGGCTCTGATACCA	5'	Diff	0.5	11.15	12.28	-	-	-	-	HORVU5Hr1G037600.7	Chaperone protein DnaJ	+
	bdi-MIR5202-3p	TTTGAACACACAAAAAGTA	19	chr2H	763289387	763289612	tttgaactcacaaaaagta	3'	New	0.8	-	2.2	-	-	-	-	HORVU1Hr1G092250.3	Receptor kinase 2	+
																	HORVU3Hr1G038360.1	Glutamine--tRNA ligase	+
	bra-MIR5721-5p	AGTGGTGATGAAAATGCT	18	chr1H	525092667	525092760	agtggagatgaaaatgct	5'	New	0.8	4.56	5.67	-	-	-	-	HORVU5Hr1G076780.5	Protein S-acyltransferase 8	+
																	HORVU5Hr1G123590.1	ADP-ribosylation factor GTPase-activating protein 2	+
	hvu-MIR6186-5p	TCTCTCGGCCTCTGCCTCTTC	21	chr3H	542691746	542691900	tctctcggcctctgcctcttc	5'	New	0.8	13.3	14.64	8.511	2.29919	7.11497	-	HORVU3Hr1G049730.2	Chromosome 3B, genomic scaffold, cultivar Chinese Spring	+
																	HORVU5Hr1G118480.5	cyclase/dehydrase family protein	+
	hvu-MIR6200-5p	GGCCAACTAGATCTATGATTCT	22	chr4H	146413805	146413995	GGCCAACTAGATCTATGAttct	5'	New	0.6	-	-	21.5427	-	17.5259	-	-
	hvu-miR6186	CGAGGAAGGCGCTGAGAGAGA	21	chr3H	542691746	542691900	CGAGGAAGGCGCTGAGAGAGA	3'	Yes	0.8	3.83	5.43	-	-	-	-	HORVU3Hr1G010570.2	Protein NRT1/ PTR FAMILY 8.2	+
	hvu-miR6191	GTCTTAGATTTGTCTAGATATGAA	24	chr3H	39453980	39454059	TAGATTTGTCTAGATATGAA	5'	Diff	1.5	2.77	4.17	-	-	-	-	HORVU6Hr1G026260.1	polyubiquitin 10	+
	hvu-MIR6198-3p	GAGTGATAACCAGAGGAGCTCGA	23	chr7H	638048997	638049084	gagtgataaccagaggagctcaa	3'	New	0.7	-	6.69	-	-	-	-	HORVU5Hr1G052600.10	Unknown	-
	hvu-MIR6200-5p	AATGGGAGAAGTGCTTGGTTT	21	chr4H	146413805	146413995	aatgggagaagtgcttggttt	5'	New	0.6	58.8	40.58	-	-	-	-	-
	hvu-MIR6200-3p	CAGTGACAGAAGGGGCAGCAAGG	23	chr4H	146413805	146413995	cagtgacagaaggggcagcaagg	3'	New	0.6	2.91	-	-	-	-	-	HORVU3Hr1G019280.2	Phosphate starvation response regulator-like protein	-
																	HORVU2Hr1G117860.1	Transcription factor bHLH112	-
	hvu-MIR6207-3p	CGACCTGGGCGCCGACGAG	19	chr6H	170804053	170804171	CGACCTGGGCGCCGACGag	3'	New	0.7	4.93	-	-	-	-	-	HORVU1Hr1G085630.1	Ubiquitin-conjugating enzyme 25	-
	hvu-miR6210-5p	ACTCCTTGGTTATCAACTTCGAACT	25	chr7H	655999041	655999086	ACTCCTTGGTTATCAACTTCGA	5'	Diff	0.7	-	-	10.9387	-	9.5672	4.63877	-
	hvu-miR6213	ATACAGATTGCTACAGACTGGTC	23	chr2H	273628488	273628705	ACAGATTGCTACAGACTGGTC	3'	Diff	0.6	1.39	1.89	-	-	-	-	-
	osa-miR6253	GTGGAAAGTGGGCAGTTGGGT	21				GAGGAAAGTGGGCAGTTGGGTT	5'	Diff	0.9	3.83	2.52	-	-	-	-	-
	osa-MIR6253-5p	CCAACAATCATTTTCCTCTCATTG	24	chr2H	122035149	122035393	ccaacaatcattttcctctcatta	5'	New	0.6	18.7	34.32	-	-	-	-	-
	osa-MIR6253-3p	ACAATCATTTTCCTCTCATTT	21	chr2H	663678906	663678974	acaatcattttcctctcatta	3'	New	0.9	7.99	13.61	-	-	-	-	HORVU5Hr1G094270.1	Auxin-responsive protein IAA13	+
																	HORVU5Hr1G094220.1	Auxin-responsive protein IAA13	+
	gma-miR6300	GTCGTTGTAGTATAGTGG	18				GTCGTTGTAGTATAGTGG	3'	Yes	1.1	6590.24	11936.6	-	-	-	-	HORVU4Hr1G052010.2	WRKY DNA-binding protein 46	+
																	HORVU0Hr1G035440.1	Non-specific phospholipase C4	+
	ptc-miR6478	CCGACTTTAGCTCAGTTGGT	20				CCGACCTTAGCTCAGTTGGTG	5'	Diff	0.7	1357.33	2790.27	-	-	-	-	HORVU7Hr1G076700.1	Myosin-J heavy chain	-
	ath-miR8175	TCCCCGGCAACGGCGCCA	18	chr7H	284882445	284882627	GATCCCCGGCAACGGCGCCA	5'	Diff	0.5	299.4	54.57	-	-	-	-	HORVU5Hr1G085710.3	Aquaporin-like superfamily protein	-
	tae-miR9652-3p	GAAGTTTAATGAGAACATGTG	21				AAGCTTAATGAGAACATGTG	3'	Diff	1.1	2.77	11.97	3.12533	8.47176	2.73349	-	HORVU4Hr1G035980.3	Saposin B domain-containing protein	+
	tae-miR9652-5p	CCTGTTTGTCATTAAATTTCTT	22				CCTGTTTGTCATTAAGTTTCTT	5'	Diff	1.1	37.61	73.95	-	-	48.586	46.5453	HORVU2Hr1G045230.2	Unknown	-
	tae-miR9660-5p	CTCGCGAGCAACGGATGAATC	21				TTGCGAGCAACGGATGAATC	5'	Diff	1.1	55.1	49.38	-	-	-	-	-
	ata-miR9674c-3p	GTGCTATGGATAAATTTAACC	21				GGTGCTATGGATAAATTCAAC	3'	Diff	1.2	7.99	17.07	10.5946	20.6745	8.93729	13.5474	HORVU7Hr1G116040.8	Phosphopantothenate--cysteine ligase 2	-
	ata-miR9674b-5p.2	TTGAATTTGTCCATAGCATCA	21	chr6H	56645984	56646113	TGAATTTGTCCATAGCATCAG	5'	Diff	1	-	-	4.16711	6.0716	3.64465	-	HORVU1Hr1G088460.1	ABC transporter ATP-binding protein ARB1	+
																	HORVU1Hr1G014030.2	Pentatricopeptide repeat-containing protein	+
																	HORVU1Hr1G067550.14	calcium-transporting ATPase, putative	+
	ata-miR9674b-5p	TGAATTTGTCCATAGCATCAG	21	chr6H	16150316	16150412	TGAATTTGTCCATAGCATCAG	5'	Yes	1	-	-	-	-	6.37814	6.34785	HORVU1Hr1G088460.1	ABC transporter ATP-binding protein ARB1	-
																	HORVU1Hr1G014040.1	Pentatricopeptide repeat-containing protein	-
	tae-miR9773	TTTGTTTTTATGTTATTTTGTGAA	24				TTTGTTTTTATGTTATTTTGTGAA	3'	Yes	0.7	37.92	167.35	-	-	-	-	-
	tae-miR9777	GCAGCAAACATATCTGAGCACA	22	chr6H	41156941	41157049	AGCAAACATATCTGAGCACA	3'	Diff	0.6	118.41	99.2	28.2816	23.7633	23.8037	14.7356	HORVU1Hr1G028200.1	Hexokinase 2	-
	tae-MIR9777-5p	GTGCCGTGATGATTGCTTTATT	22	chr6H	41156941	41157049	gtgccgtgatgattgctttact	5'	New	0.6	28.89	42.66	-	-	-	-	HORVU7Hr1G042740.2	NHL domain-containing protein	-
	hvu-MIR9777-5p	GTGCCGTGATGATTGCTTT	19	chr6H	41156941	41157049		5'	New	0.6	-	-	-	15.1492	-	-	HORVU5Hr1G049180.2	kinesin 3	+
	tae-miR9779	AATGCAACGTCTGAGGAT	18				CTTATGCAACGTCTGAGGAT	3'	Diff	0.6	143.12	121.9	-	-	-	-	HORVU1Hr1G042050.17	Coatomer subunit gamma-2	+
	PC-miR1	TCCGTATGTAGTCCTCTAG	19	chr7H	408858412	408858595		3'	New	1.3	1.52	-	-	-	-	-	-
	PC-miR2	AATCACCGAGCTGACCCTTTTGTG	24	chr6H	264523982	264524181		3'	New	0.9	43.01	99.22	-	-	-	-	-
	PC-miR3	GTCGGTGCAGATCTTGGTGG	20	chr6H	83551145	83551318		3'	New	1.7	31.62	31.65	-	-	-	-	-
	PC-miR4	TCAAACTTGGGCTCCCATTCT	21	chr7H	64352163	64352450		5'	New	1.6	10.35	3.54	-	-	-	-	HORVU6Hr1G018420.3	Calnexin 1	+
																	HORVU6Hr1G018370.1	Calnexin 1	+
	PC-miR5	TTGCTGAGAGCTGCTCGGATG	21	chr5H	654262362	654262701		3'	New	1.4	5.4	4.95	9.69695	8.29051	8.20705	-	HORVU0Hr1G040170.4	Wall associated kinase 3	-
																	HORVU3Hr1G113720.11	BTB/POZ domain-containing protein FBL11	-
																	HORVU2Hr1G126290.1	Uncharacterised conserved protein (UCP030210)	-
																	HORVU6Hr1G066470.4	Calcium-dependent protein kinase family protein	-
	PC-miR6	TCTAGGGTCAATGGCGTTTCC	21	chr6H	133925060	133925419		3'	New	1.3	8.04	-	5.38567	-	4.38148	5.56652	HORVU7Hr1G115120.44	Transcription initiation factor TFIID subunit 1	-
																	HORVU2Hr1G046850.1	Serine/threonine-protein kinase Rio1	-
	PC-miR7	TCTTCTATTGGTCCAGAGCAC	21	chr2H	645121236	645121425		3'	New	1.3	3.55	7.32	13.6641	9.74303	11.4027	-	HORVU6Hr1G017680.3	E3 ubiquitin-protein ligase MARCH8	-
																	HORVU6Hr1G018960.9	Disease resistance protein	-
	PC-miR8	AAAGTATAGGGCTGGAGTGGT	21	chr4H	622618118	622618432		3'	New	1.7	15.15	8.26	9.55278	11.0739	8.02613	-	HORVU4Hr1G062670.1	Leucine-rich repeat protein kinase family protein	-
																	HORVU6Hr1G081640.1	Subtilisin-like protease	-
																	HORVU5Hr1G033940.1	Trehalose phosphate synthase	-
	PC-miR9	AAGTTTGGAAATTCGAGGAGC	21	chr5H	226640903	226641175		5'	New	0.9	9.69	8.97	3.64622	10.8719	3.18907	4.63877	HORVU2Hr1G060510.17	Protein phosphatase 1 regulatory subunit 7	-
	PC-miR10	ACTTAGTCTTGGCACTATAAATTT	24	chr5H	479890802	479890978		5'	New	1.2	17.38	27.28	28.1048	9.15788	23.9781	27.7622
	PC-miR11	AAATGTACGGAAGGGTATTTC	21	chr7H	264721919	264722214		3'	New	1.6	34.71	26.11	18.7288	34.7155	15.7776	15.8858
	PC-miR12	TTTGAGGGTTCTAGTTTTGCC	21	chr7H	333778477	333778701		3'	New	1.3	13.26	7.7	11.7805	17.5494	10.0294	9.09311
	PC-miR13	GAATTTCGTCAGTGCCTCCCC	21	chr6H	153906088	153906312		5'	New	1.2	27.57	18.96	11.669	-	9.49321	-
	PC-miR14	TGGACGTGGAGGTGCAGCTGC	21	chr5H	620327660	620327771		5'	New	0.9	262.69	162.95	40.6714	20.9179	-	-	HORVU2Hr1G063350.1	Coffea canephora DH200=94 genomic scaffold, scaffold_8	+
	PC-miR15	CCGACGATCTTCCCGTGG	18	chr4H	233806116	233806172		5'	New	0.9	779.7	94.49	961.298	392.844	-	-	HORVU5Hr1G004340.2	ADP-ribosylation factor family protein	+
																	HORVU4Hr1G090800.2	Charged multivesicular body protein 3	+
	PC-miR16	CAGAATTTCGTCAGTGCCTCCC	22	chrUn	221974862	221975085		5'	New	1.5	5.81	10.38	8.97612	-	-	-	HORVU7Hr1G021700.1	3'(2'),5'-bisphosphate nucleotidase	+
	PC-miR17	CCTCTGTCCCATAATGTAAGA	21	chr2H	168223142	168223261		5'	New	1.2	25.24	20.37	25.6214	23.52	-	-	HORVU3Hr1G084510.2	Pentatricopeptide repeat-containing protein	-
																	HORVU7Hr1G051710.9	Glycogen debranching enzyme	-
	PC-miR18	GGGAGAAGCGCAGTGCTCACCTGC	24	chr2H	618308563	618308645		5'	New	1.2	3.7	10.85	11.1154	-	-	-
	PC-miR19	TCCCGGCTGGGGGCTCCA	18	chr7H	277416210	277416317		5'	New	1.3	3.04	5.98	-	1.91599	-	-	HORVU2Hr1G005630.19	RING/U-box superfamily protein	+
																	HORVU5Hr1G081250.2	Cytochrome P450 superfamily protein	+
	PC-miR20	TGAGTGTGTGTCTCCTGTTGC	21	chr6H	24867693	24868058		5'	New	1	30.06	129.57	-	-	-	105.998	HORVU6Hr1G016570.5	Calmodulin-binding protein	-
	PC-miR21	TCAGTCGATGTGGTCAAGGCT	21	chr6H	119029213	119029581		3'	New	1.3	10.77	7.95	-	-	2.27791	-	HORVU4Hr1G058250.2	DNA (cytosine-5)-methyltransferase 1	-
	PC-miR22	TTTGGACATCTGAGCAGCTCT	21	chr7H	444689474	444689774		5'	New	1.7	3.92	7.39	-	-	12.9504	-	HORVU2Hr1G093810.3	P-loop containing nucleoside triphosphate hydrolases superfamily protein	-
																	HORVU5Hr1G093980.1	Vacuolar protein sorting-associated protein 18 homolog	-
	PC-miR23	TAAATTTCTCCATAGCATCAG	21	chr3H	638444075	638444194		5'	New	1	28.94	14.64	-	-	15.5901	11.9904	HORVU0Hr1G035310.1	Pentatricopeptide repeat-containing protein	+
																	HORVU1Hr1G010990.1	Pentatricopeptide repeat 336	+
																	HORVU1Hr1G011020.4	Pentatricopeptide repeat-containing protein	+
	PC-miR24	TTGTTTATTTTGCCACGCCT	20	chr6H	162504321	162504430		3'	New	1.5	24.69	11.01	-	-	16.146	15.1805	HORVU7Hr1G059220.43	Kinesin-like protein 1	-
																	HORVU5Hr1G066370.13	Copper-transporting ATPase 1	-
	PC-miR25	GTAGCCCAACACCAATATAGA	21	chr4H	130751670	130751935		3'	New	0.9	19.4	16.27	-	-	21.2643	3.52658	-
	PC-miR26	CGGAATTTCGTCAGTGCCTCCCC	23	chr3H	678746643	678746866		5'	New	1.4	23.48	26.43	-	-	20.4469	7.75848	-
	PC-miR27	CTTGGTGATGGAACGTGTGAT	21	chr1H	2065863	2065967		5'	New	1.2	-	-	80.8777	9.35983	65.9376	-	HORVU6Hr1G087330.4	ENTH/ANTH/VHS superfamily protein	+
																	HORVU3Hr1G012110.1	Receptor-like protein kinase 4	-
	PC-miR28	TCAGTGCGATCCCTCTGGAAT	21	chr2H	619012666	619012807		3'	New	0.9	-	-	128.874	121.53	108.44	102.178	HORVU2Hr1G064140.13	Calcineurin-like metallo-phosphoesterase superfamily protein	-
																	HORVU3Hr1G078110.7	E3 ubiquitin-protein ligase RING1	-
	PC-miR29	CGGAATTTCGTCAGTGCCTCCC	22	chr5H	276284103	276284286		5'	New	1.2	-	-	7.1809	-	5.84198	4.2319	HORVU7Hr1G021700.1	3'(2'),5'-bisphosphate nucleotidase	+
	PC-miR30	TCTCGCCGACTGCGCACACGC	21	chr4H	123352381	123352466		5'	New	0.9	-	-	7.29244	11.1955	6.37814	19.19	HORVU2Hr1G079890.1	Malectin/receptor-like protein kinase family protein	-
																	HORVU3Hr1G014270.2	Phloem-specific lectin	-
	PC-miR31	AGGTCGCCTGGGTGGGTCC	19	chr1H	150849185	150849316		3'	New	1.1	-	-	15.2594	7.88661	12.4142	-	HORVU2Hr1G030810.1	F-box only protein 13	-
																	HORVU7Hr1G008050.1	Receptor-like protein kinase	-
	PC-miR32	TAGTCAAAACCAGGTCCGCGT	21	chr1H	286441802	286442002		3'	New	1.5	-	-	5.72978	4.82103	5.01139	4.63877	HORVU4Hr1G002010.2	unknown function	+
	PC-miR33	TTTAGTCCCGGTTTGTGCCTC	21	chr2H	184318966	184319161		3'	New	1	-	-	20.9566	4.35755	17.7808	3.52658	HORVU3Hr1G067300.1	Demethylmenaquinone methyltransferase	-
	PC-miR34	TAGCCCAACACCAATATAGA	20	chr4H	375232563	375232673		3'	New	0.9	-	-	5.38567	-	4.38148	-	HORVU3Hr1G025920.2	Cytochrome P450 superfamily protein	-
	PC-miR35	AATGCCCTTCCGTACATTTTC	21	chr5H	529499644	529499813		5'	New	1.7	-	-	97.2347	55.8147	81.809	89.8625	HORVU1Hr1G061270.2	Disease resistance RPP13-like protein 4	-
	PC-miR36	CAGGAGGTCGCCTGGGTGGGTCC	23	chr4H	515104115	515104242		3'	New	0.9	-	-	5.38567	-	4.38148	-	-
	PC-miR37	TTTGTTTATTTTGCCACGCCT	21	chr2H	699780897	699781103		3'	New	2.1	-	-	28.8583	74.2521	24.5274	38.1195	HORVU7Hr1G059220.43	kinesin-like protein 1	+
	PC-miR38	GGTCGCCTGGGTGGGTCC	18	chr2H	561804951	561805114		3'	New	0.9	-	-	35.9045	2.42086	29.2099	-	HORVU1Hr1G068790.1	ADP-ribosylation factor 1	+
																	HORVU3Hr1G062520.2	Metal ion binding protein, putative, expressed	+
																	HORVU4Hr1G015260.2	Chlorophyll a-b binding protein 2, chloroplastic	+
	PC-miR39	TCACTAGAAGACTACATACGG	21	chr2H	3813825	3813994		5'	New	1.4	-	-	12.3898	36.8516	10.3978	14.2528	HORVU7Hr1G052840.2	Ras-related protein Rab-25	-
	PC-miR40	AGGAGGTCGCCTGGGTGGGTCC	22	chr6H	202164884	202165009		3'	New	1	-	-	9.78534	-	8.11988	-	HORVU2Hr1G030810.1	F-box only protein 13	-
																	HORVU7Hr1G008050.1	Receptor-like protein kinase	-
	PC-miR41	TGTGCTCTGGATCCGATG	18	chr7H	107652517	107652655		5'	New	1.3	-	-	8.97612	-	7.30247	-	HORVU1Hr1G080480.2	6-phosphogluconate dehydrogenase, decarboxylating 1	+
																	HORVU2Hr1G110940.2	Chaperone protein DnaJ	+
																	HORVU1Hr1G004790.3	Leucine-rich repeat protein kinase family protein	+
	PC-miR42	ACAATCGAGGAGCTCGTGGCA	21	chr6H	309087816	309087978		5'	New	1	-	-	12.2456	9.23815	10.2169	4.63877	HORVU6Hr1G073170.1	Zinc finger protein CONSTANS-LIKE 16	-
	PC-miR43	TTGAACGCGCCCACCGGTGTT	21	chr6H	574049098	574049262		5'	New	1.2	1.52	3.15	-	-	-	-	HORVU7Hr1G083670.3	Cytochrome P450 superfamily protein	-
	PC-miR44	AGGGCATGCGCGTAGTTTTAGGTT	24	chrUn	180886343	180886601		5'	New	1.2	5.73	6.53	-	-	-	-	HORVU2Hr1G093690.1	Expansin A5	-
																	HORVU2Hr1G015160.1	Short-chain dehydrogenase reductase 2a	-
	PC-miR45	ACGACCTAGAACTACGCGCATGCC	24	chrUn	180886343	180886601		3'	New	1.2	9.71	12.82	-	-	-	-	HORVU2Hr1G093690.1	Expansin A5	-
																	HORVU5Hr1G076150.1	Uridine kinase	-
	PC-miR46	TTTAGTCCCGGTTCGAGACACGAA	24	chr2H	15221736	15221869		3'	New	1.4	3.24	-	-	-	-	-	HORVU7Hr1G098400.4	Chlororespiratory reduction 42	-
																	HORVU3Hr1G109380.3	Cysteine-rich receptor-like protein kinase 10	-
	PC-miR47	TGGGTTGCACCTCGTAGGTCTC	22	chr5H	28401464	28401788		5'	New	1.1	6.14	10.78	-	-	-	-	HORVU3Hr1G105560.1	Glucan endo-1,3-beta-glucosidase GI	-
																	HORVU5Hr1G089840.2	Receptor kinase 3	-
	PC-miR48	ATAGAGGGATGGTATATTTGC	21	chr4H	3130183	3130429		5'	New	1.5	7.86	11.8	-	-	-	-	HORVU0Hr1G000020.5	Leucine-rich repeat receptor-like protein kinase family protein	-
	PC-miR49	AACGACCTAGAACTACGCGCATGC	24	chr3H	405670637	405670851		3'	New	1.6	8.79	23.13	-	-	-	-	HORVU2Hr1G093690.1	Expansin A5	-
	PC-miR50	CTACTCCCTCCTATTCATATT	21	chr2H	220573773	220573864		5'	New	1	6.23	-	-	-	-	-	HORVU4Hr1G078610.3	Mitochondrial import inner membrane translocase subunit Tim17/Tim22/Tim23 family protein	-
																	HORVU6Hr1G044080.1	Protein SIP5	-
	PC-miR51	TTGGACCGTTTGATCGTTTTC	21	chr6H	418394253	418394561		5'	New	1.5	8.5	3.3	-	-	-	-	HORVU6Hr1G005510.2	Mitochondrial transcription termination factor family protein	-
																	HORVU6Hr1G077890.4	Non-specific lipid transfer protein-like 1	-
																	HORVU7Hr1G008050.1	Receptor-like protein kinase	-
	PC-miR52	TTTATTGGTCCCCTTAGTATT	21	chr2H	454335130	454335356		5'	New	1.3	1.52	-	-	-	-	-	HORVU2Hr1G120630.5	Pentatricopeptide repeat-containing protein	-
																	HORVU5Hr1G000170.8	Trypsin family protein	-
																	HORVU7Hr1G021000.1	Anthocyanin 5-aromatic acyltransferase	-
	PC-miR53	AACCTAAAACTACGCGCATGCCCT	24	chrUn	180960581	180960809		3'	New	1.4	3.24	14.31	-	-	-	-	HORVU2Hr1G093690.1	Expansin A5	-
																	HORVU5Hr1G076150.1	Uridine kinase	-
	PC-miR54	TATGTGGTCAGTGGTTAGCGG	21	chr4H	177231493	177231718		5'	New	1.7	1.52	1.89	-	-	-	-	HORVU2Hr1G015340.3	Receptor kinase 2	-
	PC-miR55	ACTTTAAGTCCCTATAAGTCCCTC	24	chr7H	236378323	236378390		5'	New	1.1	-	4.09	-	-	-	-	HORVU3Hr1G015680.1	Zinc-binding dehydrogenase family protein	-
																	HORVU7Hr1G118770.1	Disease resistance-responsive (dirigent-like protein) family protein	-
	PC-miR56	ACAACTTAGAACTACGCGCATGTC	24	chr4H	252638472	252638710		3'	New	1.6	-	5.9	-	-	-	-	HORVU5Hr1G076150.1	Uridine kinase	-
																	HORVU2Hr1G093690.1	Expansin A5	-
	PC-miR57	TTGATGACCTAAATTCCCGTC	21	chr4H	554116492	554116724		3'	New	1	2.91	-	-	-	-	-	HORVU5Hr1G077790.4	Beta glucosidase 11	-
																	HORVU1Hr1G044020.1	Myosin XI B	-
	PC-miR58	AGCCCAACACCAATATAGA	19	chr5H	561743033	561743303		3'	New	0.9	5.35	1.65	-	-	-	-	HORVU3Hr1G025920.2	Cytochrome P450 superfamily protein	-
																	HORVU5Hr1G070720.1	Chaperone protein htpG family protein	-
	PC-miR59	TTTACAAGGCCCGCATGCATT	21	chr5H	437939986	437940225		5'	New	1.2	2.53	3.3	-	-	-	-	HORVU3Hr1G053290.1	Pentatricopeptide repeat-containing protein	-
	PC-miR60	TTTCCCATGGCAAATCGAACG	21	chr3H	633418072	633418313		5'	New	1.3	2.91	3.3	-	-	-	-	HORVU4Hr1G006780.1	Phosphatidylinositol-4-phosphate 5-kinase 1	-
	PC-miR61	TTGATGCGTGAGGTTCGCTCC	21	chr7H	27956971	27957223		5'	New	1.4	3.7	-	-	-	-	-	HORVU7Hr1G058140.13	Solute carrier family 12 member 7	-
	PC-miR62	GGTAGAATGGGCACCCAAGTTTGA	24	chr7H	64352163	64352450		3'	New	1.6	-	3.54	-	-	-	-	HORVU2Hr1G044910.54	Unknown	-
	PC-miR63	GATTGAGTGATTGAAACTTGAG	22	chr6H	479901244	479901403		5'	New	0.9	-	4.72	-	-	-	-	HORVU7Hr1G017700.1	Unkonwn	-
	PC-miR64	ACCGTGGGTGCCTATTCTACT	21	chr4H	307003718	307003962		5'	New	1	2.77	14.79	-	-	-	-
	PC-miR65	TAGATTGGGCACCCAGGTTTGA	22	chr4H	307003718	307003962		3'	New	1	5.22	1.65	-	-	-	-
	PC-miR66	GTTCTAGGTTTGTCCCAAGTCAAA	24	chr5H	585261749	585261994		5'	New	1.2	2.77	1.89	-	-	-	-
	PC-miR67	TCGACTTAGGATGGACCTAGA	21	chr5H	585261749	585261994		3'	New	1.2	5.22	8.57	-	-	-	-
	PC-miR68	TAGAGCCTTGGCCACATCGAC	21	chr6H	119029213	119029581		5'	New	1.3	16.1	7.71	-	-	-	-
	PC-miR69	AACGCTGTTGGGCGGGGTTCAA	22	chr6H	574049098	574049262		3'	New	1.2	9.01	8.73	-	-	-	-
	PC-miR70	CAGTGCGATCCCTCTGGAAT	20	chr2H	756463319	756463434		3'	New	1	5.4	2.2	-	-	-	-
	PC-miR71	ACTAATGGCGCACCAGCTGGTGGT	24	chr3H	68729526	68729641		3'	New	1.9	1.39	9.28	-	-	-	-
	PC-miR72	ACAATAACATTCGGCTAGTGGTCT	24	chr2H	762545361	762545615		3'	New	1.7	3.24	9.04	-	-	-	-
	PC-miR73	AATGCGTCATTAGTAACCCTGGTT	24	chr7H	26994115	26994253		5'	New	1.4	2.31	2.2	-	-	-	-
	PC-miR74	TGTGTGGTGCGTCATTACTAG	21	chr7H	81017775	81017979		5'	New	1.2	6.08	18.08	-	-	-	-
	PC-miR75	CTCGCCGACTGCGCACACGC	20	chr4H	59508268	59508355		5'	New	1	3.37	1.65	-	-	-	-
	PC-miR76	ACGGCTGCATCGATACATCCAACG	24	chr4H	602277954	602278173		5'	New	1.1	5.09	8.58	-	-	-	-
	PC-miR77	ACCACTAATGACGCACCTATA	21	chr1H	405769502	405769776		5'	New	1.2	2.03	8.57	-	-	-	-
	PC-miR78	ATGAGATCGCCTCTGTACTCCTCC	24	chr5H	452617107	452617451		5'	New	1.2	22.88	35.64	-	-	-	-
	PC-miR79	CAACAATTTCGGACTTCATT	20	chr2H	32008440	32008556		5'	New	0.9	6.32	1.65	-	-	-	-
	PC-miR80	CCACGGACAAGGGGAATCCGA	21	chr2H	403780683	403780774		5'	New	0.9	7.53	59.33	-	-	-	-
	PC-miR81	TTCGATGATCTCCTGATTTTTTC	23	chr7H	559806883	559807172		5'	New	1.6	6.01	15.64	-	-	-	-
	PC-miR82	CGAAATACTCGTAGTTGGGGG	21	chr1H	352321305	352321395		5'	New	1.6	-	2.75	-	-	-	-
	PC-miR83	AGTTGAGACACTTATTTTAGGACG	24	chr7H	269775071	269775173		3'	New	1.3	-	4.64	-	-	-	-
	PC-miR84	ATGGCACGTCAGAAACTCAGCAGG	24	chr7H	593806156	593806453		3'	New	1.1	2.31	5.67	-	-	-	-
	PC-miR85	AATTGACGACCTAGGTACACGTGC	24	chr6H	506884391	506884621		3'	New	1.2	6.94	18.18	-	-	-	-
	PC-miR86	TTACAGTTTCACGATGCGGGTT	22	chr2H	31891127	31891278		3'	New	1	3.92	1.65	-	-	-	-
	PC-miR87	TAACGGAGGGAGTAATTGGTA	21	chr4H	176295164	176295358		3'	New	0.9	1.85	3.3	-	-	-	-
	PC-miR88	CGTATGCTGTGCTCTGGATC	20	chr4H	482827255	482827479		5'	New	1.4	4.05	3.3	-	-	-	-
	PC-miR89	TCTGTAAATTAATATAAGATC	21	chr1H	316027382	316027474		5'	New	1.8	5.9	7.16	-	-	-	-
	PC-miR90	ACACCAGGTGCGCTATTAGTAACC	24	chr4H	179509501	179509734		3'	New	1.1	1.39	5.19	-	-	-	-
	PC-miR91	ATTTCGACAGCGCCTCCTTGTTGT	24	chr4H	248941715	248941933		5'	New	1.4	1.85	4.09	-	-	-	-
	PC-miR92	AGCCTCTCTCGCCCCACCA	19	chr3H	225361925	225361989		3'	New	0.9	4.38	4.72	-	-	-	-
	PC-miR93	AATACCCTTGGACCCCACTTG	21	chr6H	492834022	492834252		5'	New	0.9	3.37	1.89	-	-	-	-
	PC-miR94	TATAATTTCTGCTTGTTCC	19	chr7H	125672338	125672410		3'	New	0.9	-	4.17	-	-	-	-
	PC-miR95	ACCTTTAGTCCCGGCTTGTAACAG	24	chr3H	12959600	12959726		3'	New	1	4.62	4.64	-	-	-	-
	PC-miR96	AAGACACTTATTTTAGGACGGAGG	24	chr5H	647462727	647462845		3'	New	1.5	2.77	7.16	-	-	-	-
	PC-miR97	ATGTCCGGGCTGTCCGCGAACCCT	24	chr4H	633422035	633422117		5'	New	1.3	3.7	5.27	-	-	-	-
	PC-miR98	AAGCCGGGACTAAAGGTGCTCCAC	24	chr7H	33603278	33603397		5'	New	1.1	2.31	1.65	-	-	-	-
	PC-miR99	AATGACGCACCACACATCAGG	21	chr1H	405769465	405769553		3'	New	1.6	1.52	6.45	-	-	-	-
	PC-miR100	AATCCCCTCCAAACCCCTTCAATT	24	chr7H	110597744	110597842		3'	New	1	2.77	6.61	-	-	-	-
	PC-miR101	TGACAGCAGTCTGCCATGGTG	21	chr7H	112664002	112664356		5'	New	0.9	3.92	-	-	-	-	-
	PC-miR102	ATCGACAACCTAGAACTACGCGCA	24	chr3H	612850623	612850811		3'	New	1.4	-	8.58	-	-	-	-
	PC-miR103	TGTATGATCTATTAGTGTG	19	chr5H	408413870	408414019		5'	New	1	24.47	11.64	-	-	-	-
	PC-miR104	ATTGTTAGTAGTGGCGCACCGTGT	24	chr1H	138109861	138109959		5'	New	1.4	5.55	5.27	-	-	-	-
	PC-miR105	ACATTTTCTGACTTCATT	18	chr2H	229574489	229574604		5'	New	0.9	1.52	-	-	-	-	-
	PC-miR106	AATTGACGACTTAGGTATACGTGC	24	chr1H	527752215	527752439		3'	New	1.3	1.85	7.87	-	-	-	-
	PC-miR107	ATACGTTTCCTCTCCTACGTTTTT	24	chr7H	41265662	41265923		3'	New	1.1	1.39	6.69	-	-	-	-
	PC-miR108	AGGAGAAGGAGAAGGAAGAGGAGA	24	chr7H	405761545	405761834		5'	New	1.3	15.06	15.74	-	-	-	-
	PC-miR109	ATGACTTATACACCGGGACGGAGG	24	chr2H	173660553	173660777		3'	New	1.4	6.01	18.49	-	-	-	-
	PC-miR110	CGGACCGAGGTAGTACATAGCAAG	24	chr3H	509694126	509694263		3'	New	1.4	3.7	10.78	-	-	-	-
	PC-miR111	TCAACTATTTCTGACTTCATT	21	chr7H	564656481	564656607		5'	New	0.9	2.31	3.15	-	-	-	-
	PC-miR112	GGAATTTCGTCAGTGCCTCCCC	22	chr5H	386676038	386676262		5'	New	1.4	12.55	13.06	-	-	-	-
	PC-miR113	AATTTGATGCGTGAGGTTCGCTCC	24	chr2H	583382654	583382879		5'	New	1.6	-	1.65	-	-	-	-
	PC-miR114	TGAAATGCATTATATGTG	18	chr7H	308415779	308415854		3'	New	0.9	40.65	20.68	-	-	-	-
	PC-miR115	TGCTCCCTCTTACCCCTTCTT	21	chr2H	596790887	596791071		5'	New	1.1	3.04	1.65	-	-	-	-
	PC-miR116	AAAGTCAGCTCTAGCACGTGCTCC	24	chr5H	499945330	499945570		3'	New	1.4	3.24	4.8	-	-	-	-
	PC-miR117	AGATTCTGGGAGAAGCTGGGGAGG	24	chr3H	543741919	543742143		3'	New	1.7	2.77	4.64	-	-	-	-
	PC-miR118	ATTGACGACCTAGATACACGTGCC	24	chr2H	721747048	721747272		3'	New	1.3	3.24	13.93	-	-	-	-
	PC-miR119	TCAGATGGTTCGTGCTGACT	20	chr5H	154581804	154582025		5'	New	0.9	8.81	2.2	-	-	-	-
	PC-miR120	AATTTCGTCAGTGCCTCCCC	20	chr6H	185390241	185390465		5'	New	1.4	5.77	7.55	-	-	-	-
	PC-miR121	AAAGGCCTGCTAGTGGCGCACCTG	24	chr5H	108112188	108112385		5'	New	1.1	-	4.72	-	-	-	-
	PC-miR122	TTTTTCTACGACACTTTAGA	20	chr2H	751856202	751856257		3'	New	1.6	4.62	4.09	-	-	-	-
	PC-miR123	AATCTCGGGTCCGCTAACACCAGC	24	chr6H	353290710	353290960		5'	New	1.2	4.8	7.24	-	-	-	-
	PC-miR124	ACTTTGGTCCCGGCTTGGAATAGG	24	chr4H	630451358	630451485		3'	New	0.9	3.7	8.58	-	-	-	-
	PC-miR125	ATTTCGTCAGTGCCTCCCC	19	chr6H	147699386	147699610		5'	New	1.3	14.67	3.78	-	-	-	-
	PC-miR126	GTCGTAGCCCTCTCAACTTTT	21	chr1H	510984417	510984646		5'	New	1.7	3.37	-	-	-	-	-
	PC-miR127	ATTGGACCCGGATTGGATATAAAC	24	chr3H	693057296	693057497		5'	New	1.4	3.7	6.84	-	-	-	-
	PC-miR128	ATGTAGTCCCTTAGTGAAATCGCT	24	chr2H	542366957	542367126		3'	New	1.4	-	7.55	-	-	-	-
	PC-miR129	ACTTGGTGATGGAACGTGTGA	21	chr1H	2547605	2547709		5'	New	1.2	3.55	-	-	-	-	-
	PC-miR130	AGTCTAGTCCCTGGGTAAAGAAAC	24	chr2H	162440459	162440635		3'	New	1.2	2.77	5.19	-	-	-	-
	PC-miR131	AATTTGATGCGTGAGGTTCGC	21	chr5H	553994579	553994797		5'	New	1.2	5.77	10.69	-	-	-	-
	PC-miR132	AACCTTCACCCAATCCCTTCAAAT	24	chr2H	610405360	610405667		3'	New	1.6	6.47	5.98	-	-	-	-
	PC-miR133	TTTGAGGGTTCTAGTCTTTGCCCC	24	chr2H	238425563	238425656		3'	New	2	2.31	2.52	-	-	-	-
	PC-miR134	GAGTTCTACAGTCCGAGG	18	chr5H	401137027	401137113		3'	New	0.9	6.36	-	-	-	-	-
	PC-miR135	TTTGTGAACATTTTGATATCT	21	chr1H	289702663	289702923		3'	New	1.7	1.85	2.52	-	-	-	-
	PC-miR136	ATACGTTATGGTGCGAGCTAC	21	chr2H	542306510	542306827		5'	New	1.5	2.77	1.65	-	-	-	-
	PC-miR137	AACGACTAATGGCACACCACCAGC	24	chr6H	224036942	224037120		5'	New	1.2	3.24	8.73	-	-	-	-
	PC-miR138	CATTTTTCCTCTTTCTTCT	19	chr2H	268495424	268495659		3'	New	1.4	7.29	-	-	-	-	-
	PC-miR139	TTTGAGGGTTCTAGTTTTGC	20	chr5H	312712041	312712401		3'	New	2.2	3.24	-	-	-	-	-
	PC-miR140	AACGGAGAGTAGCATAGAGTAGTA	24	chr5H	132724730	132724949		3'	New	0.9	1.39	3.54	-	-	-	-
	PC-miR141	AGTCCCGGCCCGTGTAACGAACCG	24	chr4H	612939600	612939726		5'	New	1	-	2.52	-	-	-	-
	PC-miR142	ATTGACGACCTAGGTACACGTGCA	24	chr5H	122382977	122383192		3'	New	1.3	7.58	13.29	-	-	-	-
	PC-miR143	TTAATCCCTTCCAATCCCCTCCAA	24	chr5H	508722822	508722915		3'	New	1	4.62	9.68	-	-	-	-
	PC-miR144	GTGTAACGAACCGGGACTAAAGGT	24	chr2H	740646865	740646991		5'	New	1.1	3.24	-	-	-	-	-
	PC-miR145	ACATCCGTATGTAGTCCTCTAG	22	chr1H	76754240	76754455		3'	New	1	-	3.15	-	-	-	-
	PC-miR146	ACTACTAATGGCGCACCATCAGCT	24	chrUn	110032489	110032576		5'	New	1.5	4.62	6.53	-	-	-	-
	PC-miR147	TGATGCACTGTGATATGTA	19	chr6H	159606479	159606554		3'	New	1	11.76	9.83	-	-	-	-
	PC-miR148	AATTGACGACCTAGATACACGTGC	24	chr3H	509766292	509766544		3'	New	1.4	18.17	43.52	-	-	-	-
	PC-miR149	ATTGACGACCTAGATACACGTGCA	24	chr7H	631754982	631755313		3'	New	1.1	2.31	18.89	-	-	-	-
	PC-miR150	ATAAGTCATTCGCGTAGTTCTAGG	24	chr2H	656492312	656492525		5'	New	1.4	8.32	4.17	-	-	-	-
	PC-miR151	TCACCGCAGGTCCTATATGTG	21	chr1H	462191779	462192042		5'	New	1.6	3.55	-	-	-	-	-
	PC-miR152	TTACTAGTCTATGTTACTACCTCC	24	chr7H	276671249	276671326		3'	New	1.2	20.99	27.21	-	-	-	-
	PC-miR153	ATGCATCGTCACCCTGTAAACCCC	24	chr2H	707097289	707097514		3'	New	1.5	6.94	12.2	-	-	-	-
	PC-miR154	AGCGGACAGACCCTTTAGAACCGG	24	chr2H	650470211	650470437		3'	New	1.4	-	6.06	-	-	-	-
	PC-miR155	ATAGGGCATGCGCGTAGTTTTAGG	24	chrUn	180960722	180960966		5'	New	1.3	1.85	4.72	-	-	-	-
	PC-miR156	ACTAATGGACTACATACGGATGTA	24	chr2H	713247010	713247141		5'	New	1.2	1.85	1.65	-	-	-	-
	PC-miR157	AGCTGGTGGTGCGTCATTAGTAGT	24	chr4H	106553290	106553606		3'	New	1.7	4.62	9.36	-	-	-	-
	PC-miR158	TGGACATCTGAGCAGCTCTTG	21	chr6H	578684781	578685027		5'	New	1.1	10.37	9.84	-	-	-	-
	PC-miR159	TGTACAATGAGCACCCAGGTT	21	chr7H	87987487	87987731		3'	New	1.1	-	1.65	-	-	-	-
	PC-miR160	ATGAATGGTGCGTCATTACTAGTT	24	chr3H	434732880	434733107		5'	New	1.3	5.55	12.74	-	-	-	-
	PC-miR161	ACTACTAATGACGCACCACCAGCT	24	chr7H	342692764	342693007		5'	New	1.4	1.39	17.94	-	-	-	-
	PC-miR162	ATTATGGGATGGAGGGAGTAA	21	chr2H	425219695	425219807		3'	New	1.3	3.41	-	-	-	-	-
	PC-miR163	TTTGGATTGAAGGGAGTATTTT	22	chr3H	38651972	38652111		3'	New	1.3	1.39	8.19	-	-	-	-
	PC-miR164	TAATTTCGTCAGTGCCTCCC	20	chr1H	485840788	485841007		5'	New	1.4	2.03	-	-	-	-	-
	PC-miR165	ACTAATGGCGCATTTGTAGGTGGT	24	chr7H	535594846	535594921		3'	New	1.4	8.32	18.01	-	-	-	-
	PC-miR166	AACTACTAATGGCGCACCATCAGC	24	chr4H	253515316	253515435		5'	New	1.5	5.09	14.32	-	-	-	-
	PC-miR167	ATATAAACCGGTTCTAAAGGGTCT	24	chr7H	6971535	6971738		5'	New	1.5	7.07	4.4	-	-	-	-
	PC-miR168	TTAGTCCCGGCTTGTAACAGGACC	24	chr7H	111113072	111113191		3'	New	1.1	-	3.3	-	-	-	-
	PC-miR169	ATCCCGGCTGGGGGCTCCA	19	chr1H	520331150	520331271		5'	New	1	3.04	5.74	-	-	-	-
	PC-miR170	AAGCCACAGCTGCAGCCGGAAGCC	24	chr2H	763612099	763612311		3'	New	1.5	1.39	5.74	-	-	-	-
	PC-miR171	TTAGTCCCGGGTGGAGCCACGACC	24	chr3H	554790913	554791135		5'	New	1.2	2.31	3.54	-	-	-	-
	PC-miR172	GTTGCTGGTGTAGTGGTTAT	20	chr3H	653111321	653111424		3'	New	1.9	1.85	-	-	-	-	-
	PC-miR173	TCCGTCCCGGTGTATAAGTCA	21	chr6H	423387144	423387368		5'	New	1.6	1.39	3.3	-	-	-	-
	PC-miR174	CGGAATTTCGTTAGTGCCTCCCC	23	chr5H	314404845	314405067		5'	New	1.4	4.16	5.9	-	-	-	-
	PC-miR175	TCCTCAGAACAACATGGCATT	21	chr3H	617766212	617766412		5'	New	1.1	-	-	2.60444	11.3975	-	-	HORVU3Hr1G003060.16	demeter-like 1	-
																	HORVU7Hr1G063720.1	Chloroplast envelope membrane protein	-
	PC-miR176	ATGCCATGCTGTTCTGAAGAA	21	chr3H	617766212	617766412		3'	New	1.1	-	-	5.20889	2.90504	-	-	HORVU4Hr1G037240.4	Protein BRASSINOSTEROID INSENSITIVE 1	-
	PC-miR177	TATACACTTGGTAAAAGG	18	chr2H	409207847	409207945		5'	New	0.9	-	-	15.2594	-	-	-	HORVU2Hr1G114070.1	Transcription factor ORG2	+
	PC-miR178	ATTTGTAGGTGGTGCGTCATTAGT	24	chr5H	412001361	412001485		3'	New	1.7	-	-	3.64622	-	-	-
	PC-miR179	AACTACTAATGGCGCACCACCAGC	24	chr1H	138109638	138109759		5'	New	1.8	-	-	5.20889	-	-	-
	PC-miR180	TCGGCGGGGCAGCGTGCA	18	chr2H	691278571	691278683		5'	New	0.9	-	-	13.2874	7.52411	-	-
	PC-miR181	TTTGGATTGAAGGGAGTTTT	20	chr3H	38651983	38652097		3'	New	1.6	-	-	-	1.91599	-	-
	PC-miR182	CCGCGCGCTCCTCCGTCGAGC	21	chr6H	565175726	565175892		3'	New	0.9	-	-	3.64622	3.06558	-	-
	PC-miR183	AGTATTTTGGTTGGAGGGAGT	21	chr3H	115793547	115793710		3'	New	1.2	-	-	-	1.91599	-	-
	PC-miR184	AGAGCCAGCTCTAGCACGTGC	21	chr3H	667560138	667560305		3'	New	1.1	-	-	-	13.0908	-	-
	PC-miR185	GTAACGAACCGGGACTAAAGGGCC	24	chr4H	639395686	639395766		5'	New	0.9	-	-	6.25067	2.29919	-	-
	PC-miR186	GGAGGTCGCCTGGGTGGGTCC	21	chr1H	531211717	531211791		3'	New	1	-	-	16.157	5.3052	-	-
	PC-miR187	GGTTGCCTGGGTGGGTCC	18	chr5H	437948662	437948738		3'	New	1.1	-	-	7.1809	-	-	-
	PC-miR188	TTGGAGCGGATTGAAAGGGAT	21	chr7H	606965473	606965575		5'	New	0.9	-	-	6.25067	12.8293	-	-
	PC-miR189	TTTCCCCGCGTCTCCACC	18	chr7H	103956179	103956323		3'	New	0.9	-	-	36.0066	3.38921	-	-
	PC-miR190	AACAATTTCTGACTTCATT	19	chr6H	557673304	557673425		5'	New	0.9	-	-	95.049	17.5494	-	-
	PC-miR191	TGTGTCGTACTTGATATGTA	20	chr2H	359439675	359439749		3'	New	1.1	-	-	8.97612	-	-	-
	PC-miR192	TGGACATCTGAGCAGCTCTTGGCA	24	chr2H	583382594	583382771		5'	New	1.3	-	-	7.1809	5.58742	-	-
	PC-miR193	TTTTTGAGTCACTTATTTTGG	21	chr5H	643007322	643007415		3'	New	1.4	-	-	2.60444	1.91599	-	-
	PC-miR194	ATGTTGTGGGATGGAGGGAGT	21	chr2H	678763849	678763947		3'	New	1.7	-	-	5.38567	7.60439	-	-
	PC-miR195	GATGCACTGTGATATGTA	18	chr3H	515167047	515167122		3'	New	1	-	-	4.48806	-	-	-
	PC-miR196	GTTAGGCAACTGAGCAGCATTGGT	24	chr2H	725704633	725704798		3'	New	1.5	-	-	13.0548	-	-	-
	PC-miR197	TAAGCAGAAACGCCACGGACT	21	chr2H	737302293	737302462		3'	New	1.3	-	-	-	3.87338	-	-
	PC-miR198	TCGGCGGGGCAGCGTGCAGA	20	chr1H	13342635	13342713		5'	New	0.9	-	-	8.65517	4.82103	-	-
	PC-miR199	ACACCAAATCACTTCCACATG	21	chr2H	15534226	15534338		3'	New	1	-	-	-	-	9.21196	184.949
	PC-miR200	AACAGGACACACACACTCACG	21	chr6H	21951647	21951746		3'	New	1.5	-	-	-	-	-	20.0037
	PC-miR201	CGGTGTCAGCTCGCCTGAAC	20	chr2H	166777020	166777164		3'	New	1	-	-	-	-	-	4.63877
	PC-miR202	TGAGGGCTTGTGGGGTCC	18	chr2H	582274917	582275018		3'	New	0.9	-	-	-	-	5.84198	-
	PC-miR203	TTTGCTCCCGCTGCAGTCGCC	21	chr6H	86216545	86216710		3'	New	1.4	-	-	-	-	20.1591	11.2851
	PC-miR204	ACTAGTCTATGTTACTACCTCCAT	24	chr1H	528891780	528891918		3'	New	0.9	-	-	-	-	-	7.05317
	PC-miR205	TCAGTCGATGTGGTCAAGGCTC	22	chr6H	119029465	119029641		3'	New	1.3	-	-	-	-	-	4.2319
	PC-miR206	ATGTTCTACCGGGGTCCTCATC	22	chr1H	13081462	13081613		3'	New	1.4	-	-	-	-	18.7857	18.9295
	PC-miR207	TGAGACACTTATTTTGAGAAC	21	chr2H	609482078	609482179		3'	New	1.4	-	-	-	-	20.9699	19.6348
	PC-miR208	TTCTGAAGAAACTGCCACCCC	21	chr5H	8640237	8640405		3'	New	1	-	-	-	-	8.20705	9.09311
	PC-miR209	ATTGGTATGGATCGGAGAGGG	21	chr5H	66865503	66865590		3'	New	1.5	-	-	-	-	2.27791	-
	PC-miR210	TGCAGATCTTGGTGGTAGTAGCAA	24	chr6H	83551131	83551304		3'	New	1.7	-	-	-	-	2.27791	68.741
	PC-miR211	ACTTGCTAGCCTCACCCATGCTTG	24	chr2H	648659709	648659844		3'	New	1.4	-	-	-	-	8.3008	7.75848
	PC-miR212	TTTGCTCCCGCCACATTCGCC	21	chr2H	194538750	194538943		3'	New	1.5	-	-	-	-	3.18907	-
	PC-miR213	AGTTGCGAACCGCGACCAAAGGCC	24	chr3H	15997515	15997719		3'	New	1.9	-	-	-	-	-	3.52658
	PC-miR214	TTGGCTAGCCCGAGTGGCCCTCG	23	chr5H	553079070	553079216		3'	New	1	-	-	-	-	2.73349	-
	PC-miR215	TTCTCCCTGCCTCTCCTCTCT	21	chr2H	618284761	618284863		3'	New	1	-	-	-	-	2.27791	37.6366
	PC-miR216	CGCCTGGGTGGTGGGTCC	18	chr3H	319651515	319651603		3'	New	0.9	-	-	-	-	3.65124	-
	PC-miR217	TGTTCTACCGGGGTCCTCATC	21	chr1H	13106446	13106559		3'	New	1.4	-	-	-	-	4.38148	3.52658
	PC-miR218	GCCCAACACCAATATAGA	18	chr4H	239662275	239662432		3'	New	1	-	-	-	-	38.7031	10.5037
	PC-miR219	GTTTCCTGCAAGCACTTCATA	21	chr2H	734457520	734457621		5'	New	0.9	-	-	-	-	2.27791	10.5797
	PC-miR220	ACATCTGAGCAGCTCTTGGCAA	22	chr2H	542280845	542281029		5'	New	1.4	-	-	-	-	-	3.52658
	PC-miR221	GAGGGCCGCGGTAGAACAGAACCC	24	chr1H	13106446	13106559		5'	New	1.4	-	-	-	-	-	5.64253
	PC-miR222	CTGACCCGAGTAGCATGG	18	chr3H	408009538	408009686		5'	New	1.5	-	-	-	-	-	3.52658	HORVU2Hr1G062170.1	Metal transporter Nramp5	-
	PC-miR223	TAATCGTAGGCGCCATGAGTT	21	chr6H	559469700	559469850		5'	New	1.6	-	-	-	-	-	4.63877
	PC-miR224	TCCGACGATCTTCCCGTGG	19	chr4H	233806117	233806173		5'	New	0.9	-	-	-	-	507.701	262.295
	PC-miR225	ATGAGGACCCCGGTAGAACATA	22	chr1H	13106522	13106633		5'	New	1.3	-	-	-	-	20.1459	30.8439
	PC-miR226	ATCATCAGACTTCGCTGGGAC	21	chr6H	375258858	375258984		5'	New	1.4	-	-	-	-	101.988	31.2508
	PC-miR227	GGGTTGCACCTCGTAGGTCTC	21	chr5H	32042659	32042820		5'	New	1.1	-	-	-	-	7.2893	-
	PC-miR228	TTGGACGTGGAGGTGCAGCTG	21	chr5H	620327660	620327771		5'	New	0.9	-	-	-	-	115.542	84.0679	HORVU2Hr1G063350.1	Coffea canephora DH200=94 genomic scaffold, scaffold_8	+
	PC-miR229	ATGTTACTACTCCTAGTTACTCCC	24	chr4H	638725835	638725917		5'	New	1.4	-	-	-	-	3.64465	9.57599
	PC-miR230	TTGGCCACATCGACTGACGGC	21	chr6H	119029465	119029641		5'	New	1.3	-	-	-	-	8.20705	-
	PC-miR231	TCGGCGGGGCAGCGTGCAGAG	21	chr1H	13342635	13342713		5'	New	0.9	-	-	-	-	4.38148	6.49428
	PC-miR232	CCACGGACAAGGGGAATCCG	20	chr2H	480500196	480500286		5'	New	0.9	-	-	-	-	-	10.0209
	PC-miR233	TGTAGAGGTGATTTGGTGATC	21	chr2H	15534226	15534338		5'	New	1	-	-	-	-	369.773	2204.44	HORVU1Hr1G060710.2	Histone-lysine N-methyltransferase	-
																	HORVU4Hr1G056740.5	Elongation factor 1-alpha	-
